# Supplementary material
Source: publisher figshare collection journal article supplement (https://acs.figshare.com/ndownloader/files/3879619)
Supplement: Supplementary file 1 [file 3879619]

#------------------ SECTION 1. GLOBAL INFORMATION ---------------------------#
 
data_ST_Sr7Cu44As23
 
#------------------ SUBMISSION DETAILS --------------------------------------#
 
# Name and address of author for correspondence
 
_publ_contact_author_name      'Yurii Prots'
_publ_contact_author_address  
;
Max-Planck-Institut f\"ur Chemische Physik fester Stoffe
N\"othnitzer Str. 40
D-01187 Dresden
Germany
;
_publ_contact_author_phone        '+49 (0)351 4646 2223'
_publ_contact_author_fax          '+49 (0)351 4646 4002'
_publ_contact_author_email        'prots@cpfs.mpg.de'
_publ_requested_journal           'Inorganic Chemistry'
_publ_requested_coeditor_name     ?

_publ_contact_letter
;
;
#------------------ TITLE, AUTHOR LIST AND TEXT------------------------------#
 
_publ_section_title
;
Synthesis, Structure and Properties of Two New Arsenides, Eu~7~Cu~44~As~23~ 
and Sr~7~Cu~44~As~23~, a New Filled Variety of the BaHg~11~ Structure
;

loop_
 _publ_author_name
 _publ_author_address
     'Charkin, Dmitry'
;     Department of Chemistry, 
      Lomonosov Moscow State University, 
      119991 Moscow, 
      Russia
;
     'Demchyna, Roman'
;     Department of Chemistry, 
      National University of Forestry and Wood Technology of Ukraine, 
      General Chuprynky Street 103, 
      79013 Lviv, 
      Ukraine
;
     'Prots, Yurii'
;     Max-Planck-Institut f\"ur Chemische Physik fester Stoffe
      N\"othnitzer Str. 40
      D-01187 Dresden
      Germany
;
     'Borrmann, Horst'
;     Max-Planck-Institut f\"ur Chemische Physik fester Stoffe
      N\"othnitzer Str. 40
      D-01187 Dresden
      Germany
;
     'Burkhardt, Ulrich'
;     Max-Planck-Institut f\"ur Chemische Physik fester Stoffe
      N\"othnitzer Str. 40
      D-01187 Dresden
      Germany
;
     'Schwarz, Ulrich'
;     Max-Planck-Institut f\"ur Chemische Physik fester Stoffe
      N\"othnitzer Str. 40
      D-01187 Dresden
      Germany
;
     'Schnelle, Walter'
;     Max-Planck-Institut f\"ur Chemische Physik fester Stoffe
      N\"othnitzer Str. 40
      D-01187 Dresden
      Germany
;
     'Plokhikh, Igor'
;     Department of Chemistry, 
      Lomonosov Moscow State University, 
      119991 Moscow, 
      Russia
;
     'Kazakov, Sergey'
;     Department of Chemistry, 
      Lomonosov Moscow State University, 
      119991 Moscow, 
      Russia
;
     'Abakumov, Artem'
;     Electron Microscopy for Materials Science (EMAT) 
      University of Antwerp
      Groenenborgerlaan 171
      2020 Antwerp
      Belgium 
;
     'Batuk, Dmitry'
;     Electron Microscopy for Materials Science (EMAT) 
      University of Antwerp
      Groenenborgerlaan 171
      2020 Antwerp
      Belgium 
;
     'Verchenko, Valeri'
;     Department of Chemistry, 
      Lomonosov Moscow State University, 
      119991 Moscow, 
      Russia
;
     'Tsirlin, Alexander'
;     National Institute of Chemical Physics and Biophysics, 
      Akadeemia tee 23, 
      12618 Tallinn, 
      Estonia  
;
     'Curfs, Caroline'
;     European Synchrotron Radiation Facility, 
      71 avenue des Martyrs      
      38000 Grenoble, 
      France
;
     'Grin, Yuri'
;     Max-Planck-Institut f\"ur Chemische Physik fester Stoffe
      N\"othnitzer Str. 40
      D-01187 Dresden
      Germany
;
     'Shevelkov, Andrei'
;     Department of Chemistry, 
      Lomonosov Moscow State University, 
      119991 Moscow, 
      Russia
;

_publ_section_exptl_prep
;
;
_publ_section_exptl_refinement
;
;
_publ_section_comment
;
;
_publ_section_acknowledgements
;
;
_publ_section_references
;
;

#------------------  SECTION 2. COMPOUND(S) DETAILS -------------------------#
 
_audit_creation_date                    2014-07-10T12:00:00-00:00
_audit_creation_method                  'WinGX routine CIF_UPDATE'
 
#------------------ CHEMICAL INFORMATION ------------------------------------#
 
_chemical_formula_sum                   'As23 Cu44 Sr7'
_chemical_formula_weight                5132.26
 
#------------------ UNIT CELL INFORMATION -----------------------------------#
 
_symmetry_cell_setting                  cubic  
_symmetry_space_group_name_H-M         'F m -3 m'  
_symmetry_space_group_name_Hall        '-F 4 2 3'

loop_
 _symmetry_equiv_pos_as_xyz
' x, y, z'
' z, x, y'
' y, z, x'
' x, y, -z'
' z, x, -y'
' y, z, -x'
'-x, y, z'
'-z, x, y'
'-y, z, x'
'-x, y, -z'
'-z, x, -y'
'-y, z, -x'
' y, x, z'
' x, z, y'
' z, y, x'
' y, x, -z'
' x, z, -y'
' z, y, -x'
' y, -x, z'
' x, -z, y'
' z, -y, x'
' y, -x, -z'
' x, -z, -y'
' z, -y, -x'
'-x, -y, -z'
'-z, -x, -y'
'-y, -z, -x'
'-x, -y, z'
'-z, -x, y'
'-y, -z, x'
' x, -y, -z'
' z, -x, -y'
' y, -z, -x'
' x, -y, z'
' z, -x, y'
' y, -z, x'
'-y, -x, -z'
'-x, -z, -y'
'-z, -y, -x'
'-y, -x, z'
'-x, -z, y'
'-z, -y, x'
'-y, x, -z'
'-x, z, -y'
'-z, y, -x'
'-y, x, z'
'-x, z, y'
'-z, y, x'
' x, 1/2+y, 1/2+z'
' z, 1/2+x, 1/2+y'
' y, 1/2+z, 1/2+x'
' x, 1/2+y, 1/2-z'
' z, 1/2+x, 1/2-y'
' y, 1/2+z, 1/2-x'
'-x, 1/2+y, 1/2+z'
'-z, 1/2+x, 1/2+y'
'-y, 1/2+z, 1/2+x'
'-x, 1/2+y, 1/2-z'
'-z, 1/2+x, 1/2-y'
'-y, 1/2+z, 1/2-x'
' y, 1/2+x, 1/2+z'
' x, 1/2+z, 1/2+y'
' z, 1/2+y, 1/2+x'
' y, 1/2+x, 1/2-z'
' x, 1/2+z, 1/2-y'
' z, 1/2+y, 1/2-x'
' y, 1/2-x, 1/2+z'
' x, 1/2-z, 1/2+y'
' z, 1/2-y, 1/2+x'
' y, 1/2-x, 1/2-z'
' x, 1/2-z, 1/2-y'
' z, 1/2-y, 1/2-x'
'-x, 1/2-y, 1/2-z'
'-z, 1/2-x, 1/2-y'
'-y, 1/2-z, 1/2-x'
'-x, 1/2-y, 1/2+z'
'-z, 1/2-x, 1/2+y'
'-y, 1/2-z, 1/2+x'
' x, 1/2-y, 1/2-z'
' z, 1/2-x, 1/2-y'
' y, 1/2-z, 1/2-x'
' x, 1/2-y, 1/2+z'
' z, 1/2-x, 1/2+y'
' y, 1/2-z, 1/2+x'
'-y, 1/2-x, 1/2-z'
'-x, 1/2-z, 1/2-y'
'-z, 1/2-y, 1/2-x'
'-y, 1/2-x, 1/2+z'
'-x, 1/2-z, 1/2+y'
'-z, 1/2-y, 1/2+x'
'-y, 1/2+x, 1/2-z'
'-x, 1/2+z, 1/2-y'
'-z, 1/2+y, 1/2-x'
'-y, 1/2+x, 1/2+z'
'-x, 1/2+z, 1/2+y'
'-z, 1/2+y, 1/2+x'
' 1/2+x, y, 1/2+z'
' 1/2+z, x, 1/2+y'
' 1/2+y, z, 1/2+x'
' 1/2+x, y, 1/2-z'
' 1/2+z, x, 1/2-y'
' 1/2+y, z, 1/2-x'
' 1/2-x, y, 1/2+z'
' 1/2-z, x, 1/2+y'
' 1/2-y, z, 1/2+x'
' 1/2-x, y, 1/2-z'
' 1/2-z, x, 1/2-y'
' 1/2-y, z, 1/2-x'
' 1/2+y, x, 1/2+z'
' 1/2+x, z, 1/2+y'
' 1/2+z, y, 1/2+x'
' 1/2+y, x, 1/2-z'
' 1/2+x, z, 1/2-y'
' 1/2+z, y, 1/2-x'
' 1/2+y, -x, 1/2+z'
' 1/2+x, -z, 1/2+y'
' 1/2+z, -y, 1/2+x'
' 1/2+y, -x, 1/2-z'
' 1/2+x, -z, 1/2-y'
' 1/2+z, -y, 1/2-x'
' 1/2-x, -y, 1/2-z'
' 1/2-z, -x, 1/2-y'
' 1/2-y, -z, 1/2-x'
' 1/2-x, -y, 1/2+z'
' 1/2-z, -x, 1/2+y'
' 1/2-y, -z, 1/2+x'
' 1/2+x, -y, 1/2-z'
' 1/2+z, -x, 1/2-y'
' 1/2+y, -z, 1/2-x'
' 1/2+x, -y, 1/2+z'
' 1/2+z, -x, 1/2+y'
' 1/2+y, -z, 1/2+x'
' 1/2-y, -x, 1/2-z'
' 1/2-x, -z, 1/2-y'
' 1/2-z, -y, 1/2-x'
' 1/2-y, -x, 1/2+z'
' 1/2-x, -z, 1/2+y'
' 1/2-z, -y, 1/2+x'
' 1/2-y, x, 1/2-z'
' 1/2-x, z, 1/2-y'
' 1/2-z, y, 1/2-x'
' 1/2-y, x, 1/2+z'
' 1/2-x, z, 1/2+y'
' 1/2-z, y, 1/2+x'
' 1/2+x, 1/2+y, z'
' 1/2+z, 1/2+x, y'
' 1/2+y, 1/2+z, x'
' 1/2+x, 1/2+y, -z'
' 1/2+z, 1/2+x, -y'
' 1/2+y, 1/2+z, -x'
' 1/2-x, 1/2+y, z'
' 1/2-z, 1/2+x, y'
' 1/2-y, 1/2+z, x'
' 1/2-x, 1/2+y, -z'
' 1/2-z, 1/2+x, -y'
' 1/2-y, 1/2+z, -x'
' 1/2+y, 1/2+x, z'
' 1/2+x, 1/2+z, y'
' 1/2+z, 1/2+y, x'
' 1/2+y, 1/2+x, -z'
' 1/2+x, 1/2+z, -y'
' 1/2+z, 1/2+y, -x'
' 1/2+y, 1/2-x, z'
' 1/2+x, 1/2-z, y'
' 1/2+z, 1/2-y, x'
' 1/2+y, 1/2-x, -z'
' 1/2+x, 1/2-z, -y'
' 1/2+z, 1/2-y, -x'
' 1/2-x, 1/2-y, -z'
' 1/2-z, 1/2-x, -y'
' 1/2-y, 1/2-z, -x'
' 1/2-x, 1/2-y, z'
' 1/2-z, 1/2-x, y'
' 1/2-y, 1/2-z, x'
' 1/2+x, 1/2-y, -z'
' 1/2+z, 1/2-x, -y'
' 1/2+y, 1/2-z, -x'
' 1/2+x, 1/2-y, z'
' 1/2+z, 1/2-x, y'
' 1/2+y, 1/2-z, x'
' 1/2-y, 1/2-x, -z'
' 1/2-x, 1/2-z, -y'
' 1/2-z, 1/2-y, -x'
' 1/2-y, 1/2-x, z'
' 1/2-x, 1/2-z, y'
' 1/2-z, 1/2-y, x'
' 1/2-y, 1/2+x, -z'
' 1/2-x, 1/2+z, -y'
' 1/2-z, 1/2+y, -x'
' 1/2-y, 1/2+x, z'
' 1/2-x, 1/2+z, y'
' 1/2-z, 1/2+y, x'

_cell_length_a                    16.7467(2)
_cell_length_b                    16.7467(2)
_cell_length_c                    16.7467(2)
_cell_angle_alpha                 90
_cell_angle_beta                  90
_cell_angle_gamma                 90
_cell_volume                      4696.64(12)
_cell_formula_units_Z             4

_cell_measurement_temperature     295
_cell_measurement_reflns_used     25  
_cell_measurement_theta_min       13.01
_cell_measurement_theta_max       40.06
_cell_special_details                   
; 
Lattice parameters were refined from Guinier powder diffraction data 
(CuK\a~1~ radiation, \l = 1.54056 \%A) by using TiO~2~ as internal standard.
; 

_exptl_crystal_F_000              9204
_exptl_crystal_density_diffrn     7.25
_exptl_crystal_density_meas        ?
_exptl_crystal_density_method     'not measured'


#------------------------- POWDER SPECIMEN DATA -----------------------------#

# The next three fields give the specimen dimensions in mm.  The equatorial 
# plane contains the incident and diffracted beam.

_pd_spec_size_axial               10      
_pd_spec_size_equat               0.3     
_pd_spec_size_thick               0.3     

# The next five fields are character fields that describe the specimen.

_pd_spec_mounting                 'sealed quartz capillary'
_pd_spec_mount_mode               'transmission'
_pd_spec_shape                    'cylinder'
_pd_char_particle_morphology      'particle size <= 0.032 mm'
_pd_char_colour                   grey
_pd_prep_cool_rate                ?        
_pd_prep_pressure                 ?        
_pd_prep_temperature              ?        

_exptl_absorpt_coefficient_mu     10.4		
_exptl_absorpt_correction_type    ?
_exptl_absorpt_process_details    ?
_exptl_absorpt_correction_T_min   ?
_exptl_absorpt_correction_T_max   ?

#------------------- EXPERIMENTAL DATA --------------------------------------#


_exptl_special_details
; ?
;

_pd_instr_location
; ?
High-resolution powder diffractometer instrument belonging to the 
ID31 beam line at the 
European Synchrotron Radiation Facility (ESRF), Grenoble, France.
;
_pd_calibration_special_details           
; 
 Si standard NIST 640c
;

_diffrn_ambient_temperature       295      
_diffrn_source                    Synchrotron      
_diffrn_radiation_type            Synchrotron       
_diffrn_measurement_device_type   ?    
_diffrn_detector_type             'Si (111) crystal analyzer'
_pd_meas_scan_method              cont 
_diffrn_measurement_method        'Debye-Scherrer'
_pd_meas_special_details          ?   
_pd_meas_number_of_points         19499
_pd_meas_2theta_range_min         1.002        
_pd_meas_2theta_range_max         40.000        
_pd_meas_2theta_range_inc         0.002        


#---------------------- REFINEMENT DATA -------------------------------------#

_pd_proc_ls_special_details
; ?
;

# The next three items are given as text.

_pd_proc_ls_profile_function      pseudo-Voigt        
_pd_proc_ls_background_function   'square polynomial for each range'
_pd_proc_ls_pref_orient_corr               
;
?
;
_pd_proc_ls_prof_R_factor         0.088        
_pd_proc_ls_prof_wR_factor        0.115        
_pd_proc_ls_prof_wR_expected      0.063        
_refine_ls_R_I_factor             0.025

_refine_special_details
; ?
;

_refine_ls_matrix_type            fullcycle        
_refine_ls_weighting_scheme       sigma
_refine_ls_weighting_details      '1/[Y~i~+\s(Y~i~)]'
_refine_ls_extinction_method      none        
_refine_ls_extinction_coef        ?         
_refine_ls_number_parameters      27        
_refine_ls_number_restraints      ?        
_refine_ls_number_constraints     ?        

_refine_ls_goodness_of_fit_all    1.85      
      
_refine_ls_restrained_S_all       ?        
_refine_ls_shift/su_max           0.01        
_refine_ls_shift/su_mean          ?


_pd_proc_2theta_range_min         1.002        
_pd_proc_2theta_range_max         40.000    
_pd_proc_2theta_range_inc         0.002        
_pd_proc_wavelength               0.39996
_diffrn_radiation_wavelength      0.39996 
                                  #given as alternative to previous item#

# Each refinement must be accompanied by a listing of the powder data
# in CIF format. Each listing should be sent as a separate file consisting 
# of one data block containing a single powder profile. The value of 
# _pd_block_diffractogram_id is used to associate each refinement with 
# its corresponding powder profile, since it must match the value
# of _pd_block_id in the file containing the powder data. A template 
# for supplying powder data in CIF format is available by ftp at
# ftp://ftp.iucr.org/pub/rietdataform.cif and an example is given 
# at ftp://ftp.iucr.org/pub/rietdataxmpl.cif.

_pd_block_diffractogram_id        ?  
_pd_proc_info_excluded_regions    ?        
_pd_proc_info_data_reduction      ?

#------------------ COMPUTER PROGRAMS USED ----------------------------------#

_computing_data_collection              ?
_computing_data_reduction               ?
_computing_cell_refinement              'WinCSD (Akselrud,2014)'
_computing_structure_refinement         'WinCSD (Akselrud,2014)'
 
#------------------ ATOMIC TYPES, COORDINATES AND THERMAL PARAMETERS --------#
 

loop_
_atom_type_symbol
_atom_type_description
_atom_type_number_in_cell
_atom_type_scat_dispersion_real
_atom_type_scat_dispersion_imag
_atom_type_scat_source
Sr    Sr       28.00     .251    1.235 WinCSD
Cu    Cu      176.00     .237     .443 WinCSD
As    As       92.00     .281     .728 WinCSD
 

loop_
 _atom_site_label
 _atom_site_type_symbol
 _atom_site_symmetry_multiplicity 
 _atom_site_Wyckoff_symbol 
 _atom_site_fract_x
 _atom_site_fract_y
 _atom_site_fract_z
 _atom_site_adp_type
 _atom_site_U_iso_or_equiv
 _atom_site_occupancy
Sr1 Sr 24 e 0.24362(7) 0.00000 0.00000 Uani 0.0092(3)  1.0
Sr2 Sr 4 a 0.00000 0.00000 0.00000 Uani 0.0087(3)  1.0
Cu1 Cu 96 k 0.13690(3) 0.13690(3) 0.25445(6) Uani 0.0157(2)  1.0
Cu2 Cu 48 h 0.00000 0.18213(5) 0.18213(5) Uani 0.0143(3)  1.0
Cu3 Cu 32 f 0.41208(5) 0.41208(5) 0.41208(5) Uani 0.0183(2)  1.0
As1 As 48 i 0.50000 0.17189(4) 0.17189(4) Uani 0.0100(3)  1.0
As2 As 32 f 0.11085(4) 0.11085(4) 0.11085(4) Uani 0.0085(1)  1.0
As3 As 8 c 0.25000 0.25000 0.25000 Uani 0.0090(3) 1.0
As4 As 4 b 0.50000 0.50000 0.50000 Uani 0.0173(5) 1.0


loop_
_atom_site_aniso_label
_atom_site_aniso_U_11
_atom_site_aniso_U_22
_atom_site_aniso_U_33
_atom_site_aniso_U_12
_atom_site_aniso_U_13
_atom_site_aniso_U_23
Sr1   0.0110(6)   0.0083(3)   0.0083(3)     0           0           0
Sr2   0.0087(6)   0.0087(6)   0.0087(6)     0           0           0
Cu1   0.0179(3)   0.0179(3)   0.0114(4)   0.0005(4)  -0.0034(3)  -0.0034(3)
Cu2   0.0131(7)   0.0150(4)   0.0150(4)     0           0         0.0018(5)
Cu3   0.0183(3)   0.0183(3)   0.0183(3)   0.0043(4)   0.0043(4)   0.0043(4)
As1   0.0096(5)   0.0102(3)   0.0102(3)     0           0         0.0019(4)
As2   0.0085(2)   0.0085(2)   0.0085(2)  -0.0007(2)  -0.0007(2)  -0.0007(2)
As3   0.0090(4)   0.0090(4)   0.0090(4)     0           0           0
As4   0.0173(8)   0.0173(8)   0.0173(8)     0           0           0

loop_
_geom_bond_atom_site_label_1
_geom_bond_atom_site_label_2
_geom_bond_distance
_geom_bond_site_symmetry_2
_geom_bond_publ_flag
Sr1     As1      3.2074(9)   105_554  yes
Sr1     As1      3.2074(9)   123_555  yes
Sr1     As1      3.2074(9)   152_545  yes
Sr1     As1      3.2074(9)   155_545  yes
Sr1     Cu2      3.220(1)     2_555   yes
Sr1     Cu2      3.220(1)     3_555   yes
Sr1     Cu2      3.220(1)     5_555   yes
Sr1     Cu2      3.220(1)    21_555   yes
Sr1     Cu1      3.2471(5)    2_555   yes
Sr1     Cu1      3.2471(5)    5_555   yes
Sr1     Cu1      3.2471(5)   21_555   yes
Sr1     Cu1      3.2471(5)   24_555   yes
Sr1     As2      3.441(1)      .      yes
Sr1     As2      3.441(1)     4_555   yes
Sr1     As2      3.441(1)    19_555   yes
Sr1     As2      3.441(1)    22_555   yes
Sr1     Cu3      3.506(1)    49_544   yes
Sr1     Cu3      3.506(1)    52_545   yes
Sr1     Cu3      3.506(1)    67_554   yes
Sr1     Cu3      3.506(1)    70_555   yes
Sr1     Sr2      4.080(1)      .      yes
Sr1     As4      4.293(1)    49_544   yes
Sr2     As2      3.2152(6)     .      yes
Sr2     As2      3.2152(6)    4_555   yes
Sr2     As2      3.2152(6)    7_555   yes
Sr2     As2      3.2152(6)   10_555   yes
Sr2     As2      3.2152(6)   19_555   yes
Sr2     As2      3.2152(6)   22_555   yes
Sr2     As2      3.2152(6)   25_555   yes
Sr2     As2      3.2152(6)   28_555   yes
Sr2     Cu2      4.3138(9)     .      yes
Sr2     Cu2      4.3138(9)    2_555   yes
Sr2     Cu2      4.3138(9)    3_555   yes
Sr2     Cu2      4.3138(9)    4_555   yes
Sr2     Cu2      4.3138(9)    5_555   yes
Sr2     Cu2      4.3138(9)    8_555   yes
Sr2     Cu2      4.3138(9)    9_555   yes
Sr2     Cu2      4.3138(9)   11_555   yes
Sr2     Cu2      4.3138(9)   20_555   yes
Sr2     Cu2      4.3138(9)   21_555   yes
Sr2     Cu2      4.3138(9)   23_555   yes
Sr2     Cu2      4.3138(9)   27_555   yes
Cu1     As2      2.483(1)      .      yes
Cu1     Cu1      2.573(1)    71_555   yes
Cu1     Cu1      2.573(1)    107_555  yes
Cu1     As1      2.6682(7)   53_545   yes
Cu1     As1      2.6682(7)   100_455  yes
Cu1     As3      2.6799(5)     .      yes
Cu1     Cu2      2.7013(8)     .      yes
Cu1     Cu2      2.7013(8)    2_555   yes
Cu1     Cu1      2.785(1)     2_555   yes
Cu1     Cu1      2.785(1)     3_555   yes
Cu1     Cu3      2.884(1)    172_555  yes
Cu2     As1      2.450(1)    100_455  yes
Cu2     As1      2.450(1)    164_455  yes
Cu2     As2      2.5094(9)     .      yes
Cu2     As2      2.5094(9)    7_555   yes
Cu2     Cu2      3.214(1)    71_555   yes
Cu3     As1      2.475(1)    71_555   yes
Cu3     As1      2.475(1)    107_555  yes
Cu3     As1      2.475(1)    171_556  yes
Cu3     As4      2.5494(8)     .      yes
Cu3     Cu3      2.944(1)     4_556   yes
Cu3     Cu3      2.944(1)     7_655   yes
Cu3     Cu3      2.944(1)    19_565   yes
As1     As1      3.699(1)    71_555   yes
As2     As2      3.7126(9)    4_555   yes
As2     As2      3.7126(9)    7_555   yes
As2     As2      3.7126(9)   19_555   yes

loop_
_geom_angle_atom_site_label_1
_geom_angle_atom_site_label_2
_geom_angle_atom_site_label_3
_geom_angle
_geom_angle_site_symmetry_1
_geom_angle_site_symmetry_2
_geom_angle_site_symmetry_3
_geom_angle_publ_flag
As1     Sr1     As1      127.68(3)   105_554   .     123_555 yes
As1     Sr1     As1       78.79(3)   105_554   .     152_545 yes
As1     Sr1     As1       78.79(3)   105_554   .     155_545 yes
As1     Sr1     Cu2       98.11(3)   105_554   .      2_555  yes
As1     Sr1     Cu2       44.82(2)   105_554   .      3_555  yes
As1     Sr1     Cu2       98.11(3)   105_554   .      5_555  yes
As1     Sr1     Cu2      172.50(4)   105_554   .     21_555  yes
As1     Sr1     Cu1       48.83(2)   105_554   .      2_555  yes
As1     Sr1     Cu1       48.83(2)   105_554   .      5_555  yes
As1     Sr1     Cu1      127.52(3)   105_554   .     21_555  yes
As1     Sr1     Cu1      127.52(3)   105_554   .     24_555  yes
As1     Sr1     As2       78.51(3)   105_554   .       .     yes
As1     Sr1     As2       78.51(3)   105_554   .      4_555  yes
As1     Sr1     As2      140.29(3)   105_554   .     19_555  yes
As1     Sr1     As2      140.29(3)   105_554   .     22_555  yes
As1     Sr1     Cu3       91.26(3)   105_554   .     49_544  yes
As1     Sr1     Cu3       91.26(3)   105_554   .     52_545  yes
As1     Sr1     Cu3       42.98(2)   105_554   .     67_554  yes
As1     Sr1     Cu3       42.98(2)   105_554   .     70_555  yes
As1     Sr1     Sr2      116.16(3)   105_554   .       .     yes
As1     Sr1     As4       63.84(2)   105_554   .     49_544  yes
As1     Sr1     As1       78.79(3)   123_555   .     152_545 yes
As1     Sr1     As1       78.79(3)   123_555   .     155_545 yes
As1     Sr1     Cu2       98.11(3)   123_555   .      2_555  yes
As1     Sr1     Cu2      172.50(4)   123_555   .      3_555  yes
As1     Sr1     Cu2       98.11(3)   123_555   .      5_555  yes
As1     Sr1     Cu2       44.82(2)   123_555   .     21_555  yes
As1     Sr1     Cu1      127.52(3)   123_555   .      2_555  yes
As1     Sr1     Cu1      127.52(3)   123_555   .      5_555  yes
As1     Sr1     Cu1       48.83(2)   123_555   .     21_555  yes
As1     Sr1     Cu1       48.83(2)   123_555   .     24_555  yes
As1     Sr1     As2      140.29(3)   123_555   .       .     yes
As1     Sr1     As2      140.29(3)   123_555   .      4_555  yes
As1     Sr1     As2       78.51(3)   123_555   .     19_555  yes
As1     Sr1     As2       78.51(3)   123_555   .     22_555  yes
As1     Sr1     Cu3       42.98(2)   123_555   .     49_544  yes
As1     Sr1     Cu3       42.98(2)   123_555   .     52_545  yes
As1     Sr1     Cu3       91.26(3)   123_555   .     67_554  yes
As1     Sr1     Cu3       91.26(3)   123_555   .     70_555  yes
As1     Sr1     Sr2      116.16(3)   123_555   .       .     yes
As1     Sr1     As4       63.84(2)   123_555   .     49_544  yes
As1     Sr1     As1      127.68(3)   152_545   .     155_545 yes
As1     Sr1     Cu2       44.82(2)   152_545   .      2_555  yes
As1     Sr1     Cu2       98.11(3)   152_545   .      3_555  yes
As1     Sr1     Cu2      172.50(4)   152_545   .      5_555  yes
As1     Sr1     Cu2       98.11(3)   152_545   .     21_555  yes
As1     Sr1     Cu1       48.83(2)   152_545   .      2_555  yes
As1     Sr1     Cu1      127.52(3)   152_545   .      5_555  yes
As1     Sr1     Cu1       48.83(2)   152_545   .     21_555  yes
As1     Sr1     Cu1      127.52(3)   152_545   .     24_555  yes
As1     Sr1     As2       78.51(3)   152_545   .       .     yes
As1     Sr1     As2      140.29(3)   152_545   .      4_555  yes
As1     Sr1     As2       78.51(3)   152_545   .     19_555  yes
As1     Sr1     As2      140.29(3)   152_545   .     22_555  yes
As1     Sr1     Cu3       91.26(3)   152_545   .     49_544  yes
As1     Sr1     Cu3       42.98(2)   152_545   .     52_545  yes
As1     Sr1     Cu3       91.26(3)   152_545   .     67_554  yes
As1     Sr1     Cu3       42.98(2)   152_545   .     70_555  yes
As1     Sr1     Sr2      116.16(3)   152_545   .       .     yes
As1     Sr1     As4       63.84(2)   152_545   .     49_544  yes
As1     Sr1     Cu2      172.50(4)   155_545   .      2_555  yes
As1     Sr1     Cu2       98.11(3)   155_545   .      3_555  yes
As1     Sr1     Cu2       44.82(2)   155_545   .      5_555  yes
As1     Sr1     Cu2       98.11(3)   155_545   .     21_555  yes
As1     Sr1     Cu1      127.52(3)   155_545   .      2_555  yes
As1     Sr1     Cu1       48.83(2)   155_545   .      5_555  yes
As1     Sr1     Cu1      127.52(3)   155_545   .     21_555  yes
As1     Sr1     Cu1       48.83(2)   155_545   .     24_555  yes
As1     Sr1     As2      140.29(3)   155_545   .       .     yes
As1     Sr1     As2       78.51(3)   155_545   .      4_555  yes
As1     Sr1     As2      140.29(3)   155_545   .     19_555  yes
As1     Sr1     As2       78.51(3)   155_545   .     22_555  yes
As1     Sr1     Cu3       42.98(2)   155_545   .     49_544  yes
As1     Sr1     Cu3       91.26(3)   155_545   .     52_545  yes
As1     Sr1     Cu3       42.98(2)   155_545   .     67_554  yes
As1     Sr1     Cu3       91.26(3)   155_545   .     70_555  yes
As1     Sr1     Sr2      116.16(3)   155_545   .       .     yes
As1     Sr1     As4       63.84(2)   155_545   .     49_544  yes
Cu2     Sr1     Cu2       84.12(3)    2_555    .      3_555  yes
Cu2     Sr1     Cu2      142.68(3)    2_555    .      5_555  yes
Cu2     Sr1     Cu2       84.12(3)    2_555    .     21_555  yes
Cu2     Sr1     Cu1       49.38(3)    2_555    .      2_555  yes
Cu2     Sr1     Cu1      133.37(3)    2_555    .      5_555  yes
Cu2     Sr1     Cu1       49.38(3)    2_555    .     21_555  yes
Cu2     Sr1     Cu1      133.37(3)    2_555    .     24_555  yes
Cu2     Sr1     As2       44.11(2)    2_555    .       .     yes
Cu2     Sr1     As2      107.72(3)    2_555    .      4_555  yes
Cu2     Sr1     As2       44.11(2)    2_555    .     19_555  yes
Cu2     Sr1     As2      107.72(3)    2_555    .     22_555  yes
Cu2     Sr1     Cu3      130.94(3)    2_555    .     49_544  yes
Cu2     Sr1     Cu3       81.93(3)    2_555    .     52_545  yes
Cu2     Sr1     Cu3      130.94(3)    2_555    .     67_554  yes
Cu2     Sr1     Cu3       81.93(3)    2_555    .     70_555  yes
Cu2     Sr1     Sr2       71.34(2)    2_555    .       .     yes
Cu2     Sr1     As4      108.66(3)    2_555    .     49_544  yes
Cu2     Sr1     Cu2       84.12(3)    3_555    .      5_555  yes
Cu2     Sr1     Cu2      142.68(3)    3_555    .     21_555  yes
Cu2     Sr1     Cu1       49.38(3)    3_555    .      2_555  yes
Cu2     Sr1     Cu1       49.38(3)    3_555    .      5_555  yes
Cu2     Sr1     Cu1      133.37(3)    3_555    .     21_555  yes
Cu2     Sr1     Cu1      133.37(3)    3_555    .     24_555  yes
Cu2     Sr1     As2       44.11(2)    3_555    .       .     yes
Cu2     Sr1     As2       44.11(2)    3_555    .      4_555  yes
Cu2     Sr1     As2      107.72(3)    3_555    .     19_555  yes
Cu2     Sr1     As2      107.72(3)    3_555    .     22_555  yes
Cu2     Sr1     Cu3      130.94(3)    3_555    .     49_544  yes
Cu2     Sr1     Cu3      130.94(3)    3_555    .     52_545  yes
Cu2     Sr1     Cu3       81.93(3)    3_555    .     67_554  yes
Cu2     Sr1     Cu3       81.93(3)    3_555    .     70_555  yes
Cu2     Sr1     Sr2       71.34(2)    3_555    .       .     yes
Cu2     Sr1     As4      108.66(3)    3_555    .     49_544  yes
Cu2     Sr1     Cu2       84.12(3)    5_555    .     21_555  yes
Cu2     Sr1     Cu1      133.37(3)    5_555    .      2_555  yes
Cu2     Sr1     Cu1       49.38(3)    5_555    .      5_555  yes
Cu2     Sr1     Cu1      133.37(3)    5_555    .     21_555  yes
Cu2     Sr1     Cu1       49.38(3)    5_555    .     24_555  yes
Cu2     Sr1     As2      107.72(3)    5_555    .       .     yes
Cu2     Sr1     As2       44.11(2)    5_555    .      4_555  yes
Cu2     Sr1     As2      107.72(3)    5_555    .     19_555  yes
Cu2     Sr1     As2       44.11(2)    5_555    .     22_555  yes
Cu2     Sr1     Cu3       81.93(3)    5_555    .     49_544  yes
Cu2     Sr1     Cu3      130.94(3)    5_555    .     52_545  yes
Cu2     Sr1     Cu3       81.93(3)    5_555    .     67_554  yes
Cu2     Sr1     Cu3      130.94(3)    5_555    .     70_555  yes
Cu2     Sr1     Sr2       71.34(2)    5_555    .       .     yes
Cu2     Sr1     As4      108.66(3)    5_555    .     49_544  yes
Cu2     Sr1     Cu1      133.37(3)   21_555    .      2_555  yes
Cu2     Sr1     Cu1      133.37(3)   21_555    .      5_555  yes
Cu2     Sr1     Cu1       49.38(3)   21_555    .     21_555  yes
Cu2     Sr1     Cu1       49.38(3)   21_555    .     24_555  yes
Cu2     Sr1     As2      107.72(3)   21_555    .       .     yes
Cu2     Sr1     As2      107.72(3)   21_555    .      4_555  yes
Cu2     Sr1     As2       44.11(2)   21_555    .     19_555  yes
Cu2     Sr1     As2       44.11(2)   21_555    .     22_555  yes
Cu2     Sr1     Cu3       81.93(3)   21_555    .     49_544  yes
Cu2     Sr1     Cu3       81.93(3)   21_555    .     52_545  yes
Cu2     Sr1     Cu3      130.94(3)   21_555    .     67_554  yes
Cu2     Sr1     Cu3      130.94(3)   21_555    .     70_555  yes
Cu2     Sr1     Sr2       71.34(2)   21_555    .       .     yes
Cu2     Sr1     As4      108.66(3)   21_555    .     49_544  yes
Cu1     Sr1     Cu1       89.82(3)    2_555    .      5_555  yes
Cu1     Sr1     Cu1       89.82(3)    2_555    .     21_555  yes
Cu1     Sr1     Cu1      173.60(4)    2_555    .     24_555  yes
Cu1     Sr1     As2       43.47(2)    2_555    .       .     yes
Cu1     Sr1     As2       92.07(3)    2_555    .      4_555  yes
Cu1     Sr1     As2       92.07(3)    2_555    .     19_555  yes
Cu1     Sr1     As2      142.93(3)    2_555    .     22_555  yes
Cu1     Sr1     Cu3      123.22(3)    2_555    .     49_544  yes
Cu1     Sr1     Cu3       87.43(3)    2_555    .     52_545  yes
Cu1     Sr1     Cu3       87.43(3)    2_555    .     67_554  yes
Cu1     Sr1     Cu3       50.38(3)    2_555    .     70_555  yes
Cu1     Sr1     Sr2       93.20(3)    2_555    .       .     yes
Cu1     Sr1     As4       86.80(2)    2_555    .     49_544  yes
Cu1     Sr1     Cu1      173.60(4)    5_555    .     21_555  yes
Cu1     Sr1     Cu1       89.82(3)    5_555    .     24_555  yes
Cu1     Sr1     As2       92.07(3)    5_555    .       .     yes
Cu1     Sr1     As2       43.47(2)    5_555    .      4_555  yes
Cu1     Sr1     As2      142.93(3)    5_555    .     19_555  yes
Cu1     Sr1     As2       92.07(3)    5_555    .     22_555  yes
Cu1     Sr1     Cu3       87.43(3)    5_555    .     49_544  yes
Cu1     Sr1     Cu3      123.22(3)    5_555    .     52_545  yes
Cu1     Sr1     Cu3       50.38(3)    5_555    .     67_554  yes
Cu1     Sr1     Cu3       87.43(3)    5_555    .     70_555  yes
Cu1     Sr1     Sr2       93.20(3)    5_555    .       .     yes
Cu1     Sr1     As4       86.80(2)    5_555    .     49_544  yes
Cu1     Sr1     Cu1       89.82(3)   21_555    .     24_555  yes
Cu1     Sr1     As2       92.07(3)   21_555    .       .     yes
Cu1     Sr1     As2      142.93(3)   21_555    .      4_555  yes
Cu1     Sr1     As2       43.47(2)   21_555    .     19_555  yes
Cu1     Sr1     As2       92.07(3)   21_555    .     22_555  yes
Cu1     Sr1     Cu3       87.43(3)   21_555    .     49_544  yes
Cu1     Sr1     Cu3       50.38(3)   21_555    .     52_545  yes
Cu1     Sr1     Cu3      123.22(3)   21_555    .     67_554  yes
Cu1     Sr1     Cu3       87.43(3)   21_555    .     70_555  yes
Cu1     Sr1     Sr2       93.20(3)   21_555    .       .     yes
Cu1     Sr1     As4       86.80(2)   21_555    .     49_544  yes
Cu1     Sr1     As2      142.93(3)   24_555    .       .     yes
Cu1     Sr1     As2       92.07(3)   24_555    .      4_555  yes
Cu1     Sr1     As2       92.07(3)   24_555    .     19_555  yes
Cu1     Sr1     As2       43.47(2)   24_555    .     22_555  yes
Cu1     Sr1     Cu3       50.38(3)   24_555    .     49_544  yes
Cu1     Sr1     Cu3       87.43(3)   24_555    .     52_545  yes
Cu1     Sr1     Cu3       87.43(3)   24_555    .     67_554  yes
Cu1     Sr1     Cu3      123.22(3)   24_555    .     70_555  yes
Cu1     Sr1     Sr2       93.20(3)   24_555    .       .     yes
Cu1     Sr1     As4       86.80(2)   24_555    .     49_544  yes
As2     Sr1     As2       65.30(2)     .       .      4_555  yes
As2     Sr1     As2       65.30(2)     .       .     19_555  yes
As2     Sr1     As2       99.46(3)     .       .     22_555  yes
As2     Sr1     Cu3      166.69(3)     .       .     49_544  yes
As2     Sr1     Cu3      121.34(3)     .       .     52_545  yes
As2     Sr1     Cu3      121.34(3)     .       .     67_554  yes
As2     Sr1     Cu3       93.85(3)     .       .     70_555  yes
As2     Sr1     Sr2       49.73(2)     .       .       .     yes
As2     Sr1     As4      130.27(3)     .       .     49_544  yes
As2     Sr1     As2       99.46(3)    4_555    .     19_555  yes
As2     Sr1     As2       65.30(2)    4_555    .     22_555  yes
As2     Sr1     Cu3      121.34(3)    4_555    .     49_544  yes
As2     Sr1     Cu3      166.69(3)    4_555    .     52_545  yes
As2     Sr1     Cu3       93.85(3)    4_555    .     67_554  yes
As2     Sr1     Cu3      121.34(3)    4_555    .     70_555  yes
As2     Sr1     Sr2       49.73(2)    4_555    .       .     yes
As2     Sr1     As4      130.27(3)    4_555    .     49_544  yes
As2     Sr1     As2       65.30(2)   19_555    .     22_555  yes
As2     Sr1     Cu3      121.34(3)   19_555    .     49_544  yes
As2     Sr1     Cu3       93.85(3)   19_555    .     52_545  yes
As2     Sr1     Cu3      166.69(3)   19_555    .     67_554  yes
As2     Sr1     Cu3      121.34(3)   19_555    .     70_555  yes
As2     Sr1     Sr2       49.73(2)   19_555    .       .     yes
As2     Sr1     As4      130.27(3)   19_555    .     49_544  yes
As2     Sr1     Cu3       93.85(3)   22_555    .     49_544  yes
As2     Sr1     Cu3      121.34(3)   22_555    .     52_545  yes
As2     Sr1     Cu3      121.34(3)   22_555    .     67_554  yes
As2     Sr1     Cu3      166.69(3)   22_555    .     70_555  yes
As2     Sr1     Sr2       49.73(2)   22_555    .       .     yes
As2     Sr1     As4      130.27(3)   22_555    .     49_544  yes
Cu3     Sr1     Cu3       49.65(3)   49_544    .     52_545  yes
Cu3     Sr1     Cu3       49.65(3)   49_544    .     67_554  yes
Cu3     Sr1     Cu3       72.85(3)   49_544    .     70_555  yes
Cu3     Sr1     Sr2      143.58(3)   49_544    .       .     yes
Cu3     Sr1     As4       36.42(2)   49_544    .     49_544  yes
Cu3     Sr1     Cu3       72.85(3)   52_545    .     67_554  yes
Cu3     Sr1     Cu3       49.65(3)   52_545    .     70_555  yes
Cu3     Sr1     Sr2      143.58(3)   52_545    .       .     yes
Cu3     Sr1     As4       36.42(2)   52_545    .     49_544  yes
Cu3     Sr1     Cu3       49.65(3)   67_554    .     70_555  yes
Cu3     Sr1     Sr2      143.58(3)   67_554    .       .     yes
Cu3     Sr1     As4       36.42(2)   67_554    .     49_544  yes
Cu3     Sr1     Sr2      143.58(3)   70_555    .       .     yes
Cu3     Sr1     As4       36.42(2)   70_555    .     49_544  yes
Sr2     Sr1     As4      180.00(2)     .       .     49_544  yes
As2     Sr2     As2       70.53(2)     .       .      4_555  yes
As2     Sr2     As2       70.53(2)     .       .      7_555  yes
As2     Sr2     As2      109.47(2)     .       .     10_555  yes
As2     Sr2     As2       70.53(2)     .       .     19_555  yes
As2     Sr2     As2      109.47(2)     .       .     22_555  yes
As2     Sr2     As2      180.00(2)     .       .     25_555  yes
As2     Sr2     As2      109.47(2)     .       .     28_555  yes
As2     Sr2     Sr1       54.74(2)     .       .       .     yes
As2     Sr2     Sr1       54.74(2)     .       .      2_555  yes
As2     Sr2     Sr1       54.74(2)     .       .      3_555  yes
As2     Sr2     Sr1      125.26(2)     .       .      6_555  yes
As2     Sr2     Sr1      125.26(2)     .       .      7_555  yes
As2     Sr2     Sr1      125.26(2)     .       .     19_555  yes
As2     Sr2     Cu2       35.26(2)     .       .       .     yes
As2     Sr2     Cu2       35.26(2)     .       .      2_555  yes
As2     Sr2     Cu2       35.26(2)     .       .      3_555  yes
As2     Sr2     Cu2       90.00        .       .      4_555  yes
As2     Sr2     Cu2       90.00        .       .      5_555  yes
As2     Sr2     Cu2       90.00        .       .      8_555  yes
As2     Sr2     Cu2       90.00        .       .      9_555  yes
As2     Sr2     Cu2      144.74(2)     .       .     11_555  yes
As2     Sr2     Cu2       90.00        .       .     20_555  yes
As2     Sr2     Cu2       90.00        .       .     21_555  yes
As2     Sr2     Cu2      144.74(2)     .       .     23_555  yes
As2     Sr2     Cu2      144.74(2)     .       .     27_555  yes
As2     Sr2     As2      109.47(2)    4_555    .      7_555  yes
As2     Sr2     As2       70.53(2)    4_555    .     10_555  yes
As2     Sr2     As2      109.47(2)    4_555    .     19_555  yes
As2     Sr2     As2       70.53(2)    4_555    .     22_555  yes
As2     Sr2     As2      109.47(2)    4_555    .     25_555  yes
As2     Sr2     As2      180.00(2)    4_555    .     28_555  yes
As2     Sr2     Sr1       54.74(2)    4_555    .       .     yes
As2     Sr2     Sr1       54.74(2)    4_555    .      2_555  yes
As2     Sr2     Sr1      125.26(2)    4_555    .      3_555  yes
As2     Sr2     Sr1       54.74(2)    4_555    .      6_555  yes
As2     Sr2     Sr1      125.26(2)    4_555    .      7_555  yes
As2     Sr2     Sr1      125.26(2)    4_555    .     19_555  yes
As2     Sr2     Cu2       90.00       4_555    .       .     yes
As2     Sr2     Cu2       90.00       4_555    .      2_555  yes
As2     Sr2     Cu2       35.26(2)    4_555    .      3_555  yes
As2     Sr2     Cu2       35.26(2)    4_555    .      4_555  yes
As2     Sr2     Cu2       35.26(2)    4_555    .      5_555  yes
As2     Sr2     Cu2      144.74(2)    4_555    .      8_555  yes
As2     Sr2     Cu2       90.00       4_555    .      9_555  yes
As2     Sr2     Cu2       90.00       4_555    .     11_555  yes
As2     Sr2     Cu2      144.74(2)    4_555    .     20_555  yes
As2     Sr2     Cu2       90.00       4_555    .     21_555  yes
As2     Sr2     Cu2       90.00       4_555    .     23_555  yes
As2     Sr2     Cu2      144.74(2)    4_555    .     27_555  yes
As2     Sr2     As2       70.53(2)    7_555    .     10_555  yes
As2     Sr2     As2      109.47(2)    7_555    .     19_555  yes
As2     Sr2     As2      180.00(2)    7_555    .     22_555  yes
As2     Sr2     As2      109.47(2)    7_555    .     25_555  yes
As2     Sr2     As2       70.53(2)    7_555    .     28_555  yes
As2     Sr2     Sr1      125.26(2)    7_555    .       .     yes
As2     Sr2     Sr1       54.74(2)    7_555    .      2_555  yes
As2     Sr2     Sr1       54.74(2)    7_555    .      3_555  yes
As2     Sr2     Sr1      125.26(2)    7_555    .      6_555  yes
As2     Sr2     Sr1       54.74(2)    7_555    .      7_555  yes
As2     Sr2     Sr1      125.26(2)    7_555    .     19_555  yes
As2     Sr2     Cu2       35.26(2)    7_555    .       .     yes
As2     Sr2     Cu2       90.00       7_555    .      2_555  yes
As2     Sr2     Cu2       90.00       7_555    .      3_555  yes
As2     Sr2     Cu2       90.00       7_555    .      4_555  yes
As2     Sr2     Cu2      144.74(2)    7_555    .      5_555  yes
As2     Sr2     Cu2       35.26(2)    7_555    .      8_555  yes
As2     Sr2     Cu2       35.26(2)    7_555    .      9_555  yes
As2     Sr2     Cu2       90.00       7_555    .     11_555  yes
As2     Sr2     Cu2       90.00       7_555    .     20_555  yes
As2     Sr2     Cu2      144.74(2)    7_555    .     21_555  yes
As2     Sr2     Cu2      144.74(2)    7_555    .     23_555  yes
As2     Sr2     Cu2       90.00       7_555    .     27_555  yes
As2     Sr2     As2      180.00(2)   10_555    .     19_555  yes
As2     Sr2     As2      109.47(2)   10_555    .     22_555  yes
As2     Sr2     As2       70.53(2)   10_555    .     25_555  yes
As2     Sr2     As2      109.47(2)   10_555    .     28_555  yes
As2     Sr2     Sr1      125.26(2)   10_555    .       .     yes
As2     Sr2     Sr1       54.74(2)   10_555    .      2_555  yes
As2     Sr2     Sr1      125.26(2)   10_555    .      3_555  yes
As2     Sr2     Sr1       54.74(2)   10_555    .      6_555  yes
As2     Sr2     Sr1       54.74(2)   10_555    .      7_555  yes
As2     Sr2     Sr1      125.26(2)   10_555    .     19_555  yes
As2     Sr2     Cu2       90.00      10_555    .       .     yes
As2     Sr2     Cu2      144.74(2)   10_555    .      2_555  yes
As2     Sr2     Cu2       90.00      10_555    .      3_555  yes
As2     Sr2     Cu2       35.26(2)   10_555    .      4_555  yes
As2     Sr2     Cu2       90.00      10_555    .      5_555  yes
As2     Sr2     Cu2       90.00      10_555    .      8_555  yes
As2     Sr2     Cu2       35.26(2)   10_555    .      9_555  yes
As2     Sr2     Cu2       35.26(2)   10_555    .     11_555  yes
As2     Sr2     Cu2      144.74(2)   10_555    .     20_555  yes
As2     Sr2     Cu2      144.74(2)   10_555    .     21_555  yes
As2     Sr2     Cu2       90.00      10_555    .     23_555  yes
As2     Sr2     Cu2       90.00      10_555    .     27_555  yes
As2     Sr2     As2       70.53(2)   19_555    .     22_555  yes
As2     Sr2     As2      109.47(2)   19_555    .     25_555  yes
As2     Sr2     As2       70.53(2)   19_555    .     28_555  yes
As2     Sr2     Sr1       54.74(2)   19_555    .       .     yes
As2     Sr2     Sr1      125.26(2)   19_555    .      2_555  yes
As2     Sr2     Sr1       54.74(2)   19_555    .      3_555  yes
As2     Sr2     Sr1      125.26(2)   19_555    .      6_555  yes
As2     Sr2     Sr1      125.26(2)   19_555    .      7_555  yes
As2     Sr2     Sr1       54.74(2)   19_555    .     19_555  yes
As2     Sr2     Cu2       90.00      19_555    .       .     yes
As2     Sr2     Cu2       35.26(2)   19_555    .      2_555  yes
As2     Sr2     Cu2       90.00      19_555    .      3_555  yes
As2     Sr2     Cu2      144.74(2)   19_555    .      4_555  yes
As2     Sr2     Cu2       90.00      19_555    .      5_555  yes
As2     Sr2     Cu2       90.00      19_555    .      8_555  yes
As2     Sr2     Cu2      144.74(2)   19_555    .      9_555  yes
As2     Sr2     Cu2      144.74(2)   19_555    .     11_555  yes
As2     Sr2     Cu2       35.26(2)   19_555    .     20_555  yes
As2     Sr2     Cu2       35.26(2)   19_555    .     21_555  yes
As2     Sr2     Cu2       90.00      19_555    .     23_555  yes
As2     Sr2     Cu2       90.00      19_555    .     27_555  yes
As2     Sr2     As2       70.53(2)   22_555    .     25_555  yes
As2     Sr2     As2      109.47(2)   22_555    .     28_555  yes
As2     Sr2     Sr1       54.74(2)   22_555    .       .     yes
As2     Sr2     Sr1      125.26(2)   22_555    .      2_555  yes
As2     Sr2     Sr1      125.26(2)   22_555    .      3_555  yes
As2     Sr2     Sr1       54.74(2)   22_555    .      6_555  yes
As2     Sr2     Sr1      125.26(2)   22_555    .      7_555  yes
As2     Sr2     Sr1       54.74(2)   22_555    .     19_555  yes
As2     Sr2     Cu2      144.74(2)   22_555    .       .     yes
As2     Sr2     Cu2       90.00      22_555    .      2_555  yes
As2     Sr2     Cu2       90.00      22_555    .      3_555  yes
As2     Sr2     Cu2       90.00      22_555    .      4_555  yes
As2     Sr2     Cu2       35.26(2)   22_555    .      5_555  yes
As2     Sr2     Cu2      144.74(2)   22_555    .      8_555  yes
As2     Sr2     Cu2      144.74(2)   22_555    .      9_555  yes
As2     Sr2     Cu2       90.00      22_555    .     11_555  yes
As2     Sr2     Cu2       90.00      22_555    .     20_555  yes
As2     Sr2     Cu2       35.26(2)   22_555    .     21_555  yes
As2     Sr2     Cu2       35.26(2)   22_555    .     23_555  yes
As2     Sr2     Cu2       90.00      22_555    .     27_555  yes
As2     Sr2     As2       70.53(2)   25_555    .     28_555  yes
As2     Sr2     Sr1      125.26(2)   25_555    .       .     yes
As2     Sr2     Sr1      125.26(2)   25_555    .      2_555  yes
As2     Sr2     Sr1      125.26(2)   25_555    .      3_555  yes
As2     Sr2     Sr1       54.74(2)   25_555    .      6_555  yes
As2     Sr2     Sr1       54.74(2)   25_555    .      7_555  yes
As2     Sr2     Sr1       54.74(2)   25_555    .     19_555  yes
As2     Sr2     Cu2      144.74(2)   25_555    .       .     yes
As2     Sr2     Cu2      144.74(2)   25_555    .      2_555  yes
As2     Sr2     Cu2      144.74(2)   25_555    .      3_555  yes
As2     Sr2     Cu2       90.00      25_555    .      4_555  yes
As2     Sr2     Cu2       90.00      25_555    .      5_555  yes
As2     Sr2     Cu2       90.00      25_555    .      8_555  yes
As2     Sr2     Cu2       90.00      25_555    .      9_555  yes
As2     Sr2     Cu2       35.26(2)   25_555    .     11_555  yes
As2     Sr2     Cu2       90.00      25_555    .     20_555  yes
As2     Sr2     Cu2       90.00      25_555    .     21_555  yes
As2     Sr2     Cu2       35.26(2)   25_555    .     23_555  yes
As2     Sr2     Cu2       35.26(2)   25_555    .     27_555  yes
As2     Sr2     Sr1      125.26(2)   28_555    .       .     yes
As2     Sr2     Sr1      125.26(2)   28_555    .      2_555  yes
As2     Sr2     Sr1       54.74(2)   28_555    .      3_555  yes
As2     Sr2     Sr1      125.26(2)   28_555    .      6_555  yes
As2     Sr2     Sr1       54.74(2)   28_555    .      7_555  yes
As2     Sr2     Sr1       54.74(2)   28_555    .     19_555  yes
As2     Sr2     Cu2       90.00      28_555    .       .     yes
As2     Sr2     Cu2       90.00      28_555    .      2_555  yes
As2     Sr2     Cu2      144.74(2)   28_555    .      3_555  yes
As2     Sr2     Cu2      144.74(2)   28_555    .      4_555  yes
As2     Sr2     Cu2      144.74(2)   28_555    .      5_555  yes
As2     Sr2     Cu2       35.26(2)   28_555    .      8_555  yes
As2     Sr2     Cu2       90.00      28_555    .      9_555  yes
As2     Sr2     Cu2       90.00      28_555    .     11_555  yes
As2     Sr2     Cu2       35.26(2)   28_555    .     20_555  yes
As2     Sr2     Cu2       90.00      28_555    .     21_555  yes
As2     Sr2     Cu2       90.00      28_555    .     23_555  yes
As2     Sr2     Cu2       35.26(2)   28_555    .     27_555  yes
Sr1     Sr2     Sr1       90.00        .       .      2_555  yes
Sr1     Sr2     Sr1       90.00        .       .      3_555  yes
Sr1     Sr2     Sr1       90.00        .       .      6_555  yes
Sr1     Sr2     Sr1      180.00(2)     .       .      7_555  yes
Sr1     Sr2     Sr1       90.00        .       .     19_555  yes
Sr1     Sr2     Cu2       90.00        .       .       .     yes
Sr1     Sr2     Cu2       45.00(2)     .       .      2_555  yes
Sr1     Sr2     Cu2       45.00(2)     .       .      3_555  yes
Sr1     Sr2     Cu2       90.00        .       .      4_555  yes
Sr1     Sr2     Cu2       45.00(2)     .       .      5_555  yes
Sr1     Sr2     Cu2      135.00(2)     .       .      8_555  yes
Sr1     Sr2     Cu2      135.00(2)     .       .      9_555  yes
Sr1     Sr2     Cu2      135.00(2)     .       .     11_555  yes
Sr1     Sr2     Cu2       90.00        .       .     20_555  yes
Sr1     Sr2     Cu2       45.00(2)     .       .     21_555  yes
Sr1     Sr2     Cu2       90.00        .       .     23_555  yes
Sr1     Sr2     Cu2      135.00(2)     .       .     27_555  yes
Sr1     Sr2     Sr1       90.00       2_555    .      3_555  yes
Sr1     Sr2     Sr1       90.00       2_555    .      6_555  yes
Sr1     Sr2     Sr1       90.00       2_555    .      7_555  yes
Sr1     Sr2     Sr1      180.00(2)    2_555    .     19_555  yes
Sr1     Sr2     Cu2       45.00(2)    2_555    .       .     yes
Sr1     Sr2     Cu2       90.00       2_555    .      2_555  yes
Sr1     Sr2     Cu2       45.00(2)    2_555    .      3_555  yes
Sr1     Sr2     Cu2       45.00(2)    2_555    .      4_555  yes
Sr1     Sr2     Cu2       90.00       2_555    .      5_555  yes
Sr1     Sr2     Cu2       90.00       2_555    .      8_555  yes
Sr1     Sr2     Cu2       45.00(2)    2_555    .      9_555  yes
Sr1     Sr2     Cu2       90.00       2_555    .     11_555  yes
Sr1     Sr2     Cu2      135.00(2)    2_555    .     20_555  yes
Sr1     Sr2     Cu2      135.00(2)    2_555    .     21_555  yes
Sr1     Sr2     Cu2      135.00(2)    2_555    .     23_555  yes
Sr1     Sr2     Cu2      135.00(2)    2_555    .     27_555  yes
Sr1     Sr2     Sr1      180.00(2)    3_555    .      6_555  yes
Sr1     Sr2     Sr1       90.00       3_555    .      7_555  yes
Sr1     Sr2     Sr1       90.00       3_555    .     19_555  yes
Sr1     Sr2     Cu2       45.00(2)    3_555    .       .     yes
Sr1     Sr2     Cu2       45.00(2)    3_555    .      2_555  yes
Sr1     Sr2     Cu2       90.00       3_555    .      3_555  yes
Sr1     Sr2     Cu2      135.00(2)    3_555    .      4_555  yes
Sr1     Sr2     Cu2      135.00(2)    3_555    .      5_555  yes
Sr1     Sr2     Cu2       45.00(2)    3_555    .      8_555  yes
Sr1     Sr2     Cu2       90.00       3_555    .      9_555  yes
Sr1     Sr2     Cu2      135.00(2)    3_555    .     11_555  yes
Sr1     Sr2     Cu2       45.00(2)    3_555    .     20_555  yes
Sr1     Sr2     Cu2       90.00       3_555    .     21_555  yes
Sr1     Sr2     Cu2      135.00(2)    3_555    .     23_555  yes
Sr1     Sr2     Cu2       90.00       3_555    .     27_555  yes
Sr1     Sr2     Sr1       90.00       6_555    .      7_555  yes
Sr1     Sr2     Sr1       90.00       6_555    .     19_555  yes
Sr1     Sr2     Cu2      135.00(2)    6_555    .       .     yes
Sr1     Sr2     Cu2      135.00(2)    6_555    .      2_555  yes
Sr1     Sr2     Cu2       90.00       6_555    .      3_555  yes
Sr1     Sr2     Cu2       45.00(2)    6_555    .      4_555  yes
Sr1     Sr2     Cu2       45.00(2)    6_555    .      5_555  yes
Sr1     Sr2     Cu2      135.00(2)    6_555    .      8_555  yes
Sr1     Sr2     Cu2       90.00       6_555    .      9_555  yes
Sr1     Sr2     Cu2       45.00(2)    6_555    .     11_555  yes
Sr1     Sr2     Cu2      135.00(2)    6_555    .     20_555  yes
Sr1     Sr2     Cu2       90.00       6_555    .     21_555  yes
Sr1     Sr2     Cu2       45.00(2)    6_555    .     23_555  yes
Sr1     Sr2     Cu2       90.00       6_555    .     27_555  yes
Sr1     Sr2     Sr1       90.00       7_555    .     19_555  yes
Sr1     Sr2     Cu2       90.00       7_555    .       .     yes
Sr1     Sr2     Cu2      135.00(2)    7_555    .      2_555  yes
Sr1     Sr2     Cu2      135.00(2)    7_555    .      3_555  yes
Sr1     Sr2     Cu2       90.00       7_555    .      4_555  yes
Sr1     Sr2     Cu2      135.00(2)    7_555    .      5_555  yes
Sr1     Sr2     Cu2       45.00(2)    7_555    .      8_555  yes
Sr1     Sr2     Cu2       45.00(2)    7_555    .      9_555  yes
Sr1     Sr2     Cu2       45.00(2)    7_555    .     11_555  yes
Sr1     Sr2     Cu2       90.00       7_555    .     20_555  yes
Sr1     Sr2     Cu2      135.00(2)    7_555    .     21_555  yes
Sr1     Sr2     Cu2       90.00       7_555    .     23_555  yes
Sr1     Sr2     Cu2       45.00(2)    7_555    .     27_555  yes
Sr1     Sr2     Cu2      135.00(2)   19_555    .       .     yes
Sr1     Sr2     Cu2       90.00      19_555    .      2_555  yes
Sr1     Sr2     Cu2      135.00(2)   19_555    .      3_555  yes
Sr1     Sr2     Cu2      135.00(2)   19_555    .      4_555  yes
Sr1     Sr2     Cu2       90.00      19_555    .      5_555  yes
Sr1     Sr2     Cu2       90.00      19_555    .      8_555  yes
Sr1     Sr2     Cu2      135.00(2)   19_555    .      9_555  yes
Sr1     Sr2     Cu2       90.00      19_555    .     11_555  yes
Sr1     Sr2     Cu2       45.00(2)   19_555    .     20_555  yes
Sr1     Sr2     Cu2       45.00(2)   19_555    .     21_555  yes
Sr1     Sr2     Cu2       45.00(2)   19_555    .     23_555  yes
Sr1     Sr2     Cu2       45.00(2)   19_555    .     27_555  yes
Cu2     Sr2     Cu2       60.00(2)     .       .      2_555  yes
Cu2     Sr2     Cu2       60.00(2)     .       .      3_555  yes
Cu2     Sr2     Cu2       90.00        .       .      4_555  yes
Cu2     Sr2     Cu2      120.00(2)     .       .      5_555  yes
Cu2     Sr2     Cu2       60.00(2)     .       .      8_555  yes
Cu2     Sr2     Cu2       60.00(2)     .       .      9_555  yes
Cu2     Sr2     Cu2      120.00(2)     .       .     11_555  yes
Cu2     Sr2     Cu2       90.00        .       .     20_555  yes
Cu2     Sr2     Cu2      120.00(2)     .       .     21_555  yes
Cu2     Sr2     Cu2      180.00(2)     .       .     23_555  yes
Cu2     Sr2     Cu2      120.00(2)     .       .     27_555  yes
Cu2     Sr2     Cu2       60.00(2)    2_555    .      3_555  yes
Cu2     Sr2     Cu2      120.00(2)    2_555    .      4_555  yes
Cu2     Sr2     Cu2       90.00       2_555    .      5_555  yes
Cu2     Sr2     Cu2       90.00       2_555    .      8_555  yes
Cu2     Sr2     Cu2      120.00(2)    2_555    .      9_555  yes
Cu2     Sr2     Cu2      180.00(2)    2_555    .     11_555  yes
Cu2     Sr2     Cu2       60.00(2)    2_555    .     20_555  yes
Cu2     Sr2     Cu2       60.00(2)    2_555    .     21_555  yes
Cu2     Sr2     Cu2      120.00(2)    2_555    .     23_555  yes
Cu2     Sr2     Cu2      120.00(2)    2_555    .     27_555  yes
Cu2     Sr2     Cu2       60.00(2)    3_555    .      4_555  yes
Cu2     Sr2     Cu2       60.00(2)    3_555    .      5_555  yes
Cu2     Sr2     Cu2      120.00(2)    3_555    .      8_555  yes
Cu2     Sr2     Cu2       90.00       3_555    .      9_555  yes
Cu2     Sr2     Cu2      120.00(2)    3_555    .     11_555  yes
Cu2     Sr2     Cu2      120.00(2)    3_555    .     20_555  yes
Cu2     Sr2     Cu2       90.00       3_555    .     21_555  yes
Cu2     Sr2     Cu2      120.00(2)    3_555    .     23_555  yes
Cu2     Sr2     Cu2      180.00(2)    3_555    .     27_555  yes
Cu2     Sr2     Cu2       60.00(2)    4_555    .      5_555  yes
Cu2     Sr2     Cu2      120.00(2)    4_555    .      8_555  yes
Cu2     Sr2     Cu2       60.00(2)    4_555    .      9_555  yes
Cu2     Sr2     Cu2       60.00(2)    4_555    .     11_555  yes
Cu2     Sr2     Cu2      180.00(2)    4_555    .     20_555  yes
Cu2     Sr2     Cu2      120.00(2)    4_555    .     21_555  yes
Cu2     Sr2     Cu2       90.00       4_555    .     23_555  yes
Cu2     Sr2     Cu2      120.00(2)    4_555    .     27_555  yes
Cu2     Sr2     Cu2      180.00(2)    5_555    .      8_555  yes
Cu2     Sr2     Cu2      120.00(2)    5_555    .      9_555  yes
Cu2     Sr2     Cu2       90.00       5_555    .     11_555  yes
Cu2     Sr2     Cu2      120.00(2)    5_555    .     20_555  yes
Cu2     Sr2     Cu2       60.00(2)    5_555    .     21_555  yes
Cu2     Sr2     Cu2       60.00(2)    5_555    .     23_555  yes
Cu2     Sr2     Cu2      120.00(2)    5_555    .     27_555  yes
Cu2     Sr2     Cu2       60.00(2)    8_555    .      9_555  yes
Cu2     Sr2     Cu2       90.00       8_555    .     11_555  yes
Cu2     Sr2     Cu2       60.00(2)    8_555    .     20_555  yes
Cu2     Sr2     Cu2      120.00(2)    8_555    .     21_555  yes
Cu2     Sr2     Cu2      120.00(2)    8_555    .     23_555  yes
Cu2     Sr2     Cu2       60.00(2)    8_555    .     27_555  yes
Cu2     Sr2     Cu2       60.00(2)    9_555    .     11_555  yes
Cu2     Sr2     Cu2      120.00(2)    9_555    .     20_555  yes
Cu2     Sr2     Cu2      180.00(2)    9_555    .     21_555  yes
Cu2     Sr2     Cu2      120.00(2)    9_555    .     23_555  yes
Cu2     Sr2     Cu2       90.00       9_555    .     27_555  yes
Cu2     Sr2     Cu2      120.00(2)   11_555    .     20_555  yes
Cu2     Sr2     Cu2      120.00(2)   11_555    .     21_555  yes
Cu2     Sr2     Cu2       60.00(2)   11_555    .     23_555  yes
Cu2     Sr2     Cu2       60.00(2)   11_555    .     27_555  yes
Cu2     Sr2     Cu2       60.00(2)   20_555    .     21_555  yes
Cu2     Sr2     Cu2       90.00      20_555    .     23_555  yes
Cu2     Sr2     Cu2       60.00(2)   20_555    .     27_555  yes
Cu2     Sr2     Cu2       60.00(2)   21_555    .     23_555  yes
Cu2     Sr2     Cu2       90.00      21_555    .     27_555  yes
Cu2     Sr2     Cu2       60.00(2)   23_555    .     27_555  yes
As2     Cu1     Cu1      144.01(4)     .       .     71_555  yes
As2     Cu1     Cu1      144.01(4)     .       .     107_555 yes
As2     Cu1     As1      109.59(4)     .       .     53_545  yes
As2     Cu1     As1      109.59(4)     .       .     100_455 yes
As2     Cu1     As3      102.78(3)     .       .       .     yes
As2     Cu1     Cu2       57.71(3)     .       .       .     yes
As2     Cu1     Cu2       57.71(3)     .       .      2_555  yes
As2     Cu1     Cu1       55.89(3)     .       .      2_555  yes
As2     Cu1     Cu1       55.89(3)     .       .      3_555  yes
As2     Cu1     Cu3      141.89(4)     .       .     172_555 yes
As2     Cu1     Sr1       72.42(3)     .       .      3_555  yes
Cu1     Cu1     Cu1       60.00(3)   71_555    .     107_555 yes
Cu1     Cu1     As1      106.31(4)   71_555    .     53_545  yes
Cu1     Cu1     As1       61.18(3)   71_555    .     100_455 yes
Cu1     Cu1     As3       61.31(3)   71_555    .       .     yes
Cu1     Cu1     Cu2       96.82(4)   71_555    .       .     yes
Cu1     Cu1     Cu2      156.51(4)   71_555    .      2_555  yes
Cu1     Cu1     Cu1      120.00(4)   71_555    .      2_555  yes
Cu1     Cu1     Cu1       90.00(3)   71_555    .      3_555  yes
Cu1     Cu1     Cu3       63.51(3)   71_555    .     172_555 yes
Cu1     Cu1     Sr1      122.59(4)   71_555    .      3_555  yes
Cu1     Cu1     As1       61.18(3)   107_555   .     53_545  yes
Cu1     Cu1     As1      106.31(4)   107_555   .     100_455 yes
Cu1     Cu1     As3       61.31(3)   107_555   .       .     yes
Cu1     Cu1     Cu2      156.51(4)   107_555   .       .     yes
Cu1     Cu1     Cu2       96.82(4)   107_555   .      2_555  yes
Cu1     Cu1     Cu1       90.00(3)   107_555   .      2_555  yes
Cu1     Cu1     Cu1      120.00(4)   107_555   .      3_555  yes
Cu1     Cu1     Cu3       63.51(3)   107_555   .     172_555 yes
Cu1     Cu1     Sr1      122.59(4)   107_555   .      3_555  yes
As1     Cu1     As1       99.44(3)   53_545    .     100_455 yes
As1     Cu1     As3      117.70(3)   53_545    .       .     yes
As1     Cu1     Cu2      129.40(4)   53_545    .       .     yes
As1     Cu1     Cu2       54.30(3)   53_545    .      2_555  yes
As1     Cu1     Cu1       99.87(3)   53_545    .      2_555  yes
As1     Cu1     Cu1      159.11(4)   53_545    .      3_555  yes
As1     Cu1     Cu3       52.77(3)   53_545    .     172_555 yes
As1     Cu1     Sr1       64.81(3)   53_545    .      3_555  yes
As1     Cu1     As3      117.70(3)   100_455   .       .     yes
As1     Cu1     Cu2       54.30(3)   100_455   .       .     yes
As1     Cu1     Cu2      129.40(4)   100_455   .      2_555  yes
As1     Cu1     Cu1      159.11(4)   100_455   .      2_555  yes
As1     Cu1     Cu1       99.87(3)   100_455   .      3_555  yes
As1     Cu1     Cu3       52.77(3)   100_455   .     172_555 yes
As1     Cu1     Sr1       64.81(3)   100_455   .      3_555  yes
As3     Cu1     Cu2      112.89(3)     .       .       .     yes
As3     Cu1     Cu2      112.89(3)     .       .      2_555  yes
As3     Cu1     Cu1       58.70(3)     .       .      2_555  yes
As3     Cu1     Cu1       58.70(3)     .       .      3_555  yes
As3     Cu1     Cu3      115.33(3)     .       .     172_555 yes
As3     Cu1     Sr1      175.20(4)     .       .      3_555  yes
Cu2     Cu1     Cu2      105.97(4)     .       .      2_555  yes
Cu2     Cu1     Cu1      106.44(4)     .       .      2_555  yes
Cu2     Cu1     Cu1       58.97(3)     .       .      3_555  yes
Cu2     Cu1     Cu3      104.41(4)     .       .     172_555 yes
Cu2     Cu1     Sr1       64.78(3)     .       .      3_555  yes
Cu2     Cu1     Cu1       58.97(3)    2_555    .      2_555  yes
Cu2     Cu1     Cu1      106.44(4)    2_555    .      3_555  yes
Cu2     Cu1     Cu3      104.41(4)    2_555    .     172_555 yes
Cu2     Cu1     Sr1       64.78(3)    2_555    .      3_555  yes
Cu1     Cu1     Cu1       60.00(3)    2_555    .      3_555  yes
Cu1     Cu1     Cu3      148.05(4)    2_555    .     172_555 yes
Cu1     Cu1     Sr1      117.37(3)    2_555    .      3_555  yes
Cu1     Cu1     Cu3      148.05(4)    3_555    .     172_555 yes
Cu1     Cu1     Sr1      117.37(3)    3_555    .      3_555  yes
Cu3     Cu1     Sr1       69.47(3)   172_555   .      3_555  yes
As1     Cu2     As1       98.03(4)   100_455   .     164_455 yes
As1     Cu2     As2      116.19(4)   100_455   .       .     yes
As1     Cu2     As2      116.19(4)   100_455   .      7_555  yes
As1     Cu2     Cu1       62.16(3)   100_455   .       .     yes
As1     Cu2     Cu1      108.14(4)   100_455   .      3_555  yes
As1     Cu2     Cu1       62.16(3)   100_455   .      7_555  yes
As1     Cu2     Cu1      108.14(4)   100_455   .      9_555  yes
As1     Cu2     Cu2       49.01(3)   100_455   .     71_555  yes
As1     Cu2     Sr1      165.35(4)   100_455   .      2_555  yes
As1     Cu2     Sr1       67.33(3)   100_455   .      3_555  yes
As1     Cu2     Sr2      130.99(3)   100_455   .       .     yes
As1     Cu2     As2      116.19(4)   164_455   .       .     yes
As1     Cu2     As2      116.19(4)   164_455   .      7_555  yes
As1     Cu2     Cu1      108.14(4)   164_455   .       .     yes
As1     Cu2     Cu1       62.16(3)   164_455   .      3_555  yes
As1     Cu2     Cu1      108.14(4)   164_455   .      7_555  yes
As1     Cu2     Cu1       62.16(3)   164_455   .      9_555  yes
As1     Cu2     Cu2       49.01(3)   164_455   .     71_555  yes
As1     Cu2     Sr1       67.33(3)   164_455   .      2_555  yes
As1     Cu2     Sr1      165.35(4)   164_455   .      3_555  yes
As1     Cu2     Sr2      130.99(3)   164_455   .       .     yes
As2     Cu2     As2       95.42(4)     .       .      7_555  yes
As2     Cu2     Cu1       56.78(3)     .       .       .     yes
As2     Cu2     Cu1       56.78(3)     .       .      3_555  yes
As2     Cu2     Cu1      135.04(4)     .       .      7_555  yes
As2     Cu2     Cu1      135.04(4)     .       .      9_555  yes
As2     Cu2     Cu2      132.29(4)     .       .     71_555  yes
As2     Cu2     Sr1       72.63(3)     .       .      2_555  yes
As2     Cu2     Sr1       72.63(3)     .       .      3_555  yes
As2     Cu2     Sr2       47.71(2)     .       .       .     yes
As2     Cu2     Cu1      135.04(4)    7_555    .       .     yes
As2     Cu2     Cu1      135.04(4)    7_555    .      3_555  yes
As2     Cu2     Cu1       56.78(3)    7_555    .      7_555  yes
As2     Cu2     Cu1       56.78(3)    7_555    .      9_555  yes
As2     Cu2     Cu2      132.29(4)    7_555    .     71_555  yes
As2     Cu2     Sr1       72.63(3)    7_555    .      2_555  yes
As2     Cu2     Sr1       72.63(3)    7_555    .      3_555  yes
As2     Cu2     Sr2       47.71(2)    7_555    .       .     yes
Cu1     Cu2     Cu1       62.06(3)     .       .      3_555  yes
Cu1     Cu2     Cu1      116.13(4)     .       .      7_555  yes
Cu1     Cu2     Cu1      166.37(4)     .       .      9_555  yes
Cu1     Cu2     Cu2       83.18(3)     .       .     71_555  yes
Cu1     Cu2     Sr1      120.97(4)     .       .      2_555  yes
Cu1     Cu2     Sr1       65.84(3)     .       .      3_555  yes
Cu1     Cu2     Sr2       96.82(3)     .       .       .     yes
Cu1     Cu2     Cu1      166.37(4)    3_555    .      7_555  yes
Cu1     Cu2     Cu1      116.13(4)    3_555    .      9_555  yes
Cu1     Cu2     Cu2       83.18(3)    3_555    .     71_555  yes
Cu1     Cu2     Sr1       65.84(3)    3_555    .      2_555  yes
Cu1     Cu2     Sr1      120.97(4)    3_555    .      3_555  yes
Cu1     Cu2     Sr2       96.82(3)    3_555    .       .     yes
Cu1     Cu2     Cu1       62.06(3)    7_555    .      9_555  yes
Cu1     Cu2     Cu2       83.18(3)    7_555    .     71_555  yes
Cu1     Cu2     Sr1      120.97(4)    7_555    .      2_555  yes
Cu1     Cu2     Sr1       65.84(3)    7_555    .      3_555  yes
Cu1     Cu2     Sr2       96.82(3)    7_555    .       .     yes
Cu1     Cu2     Cu2       83.18(3)    9_555    .     71_555  yes
Cu1     Cu2     Sr1       65.84(3)    9_555    .      2_555  yes
Cu1     Cu2     Sr1      120.97(4)    9_555    .      3_555  yes
Cu1     Cu2     Sr2       96.82(3)    9_555    .       .     yes
Cu2     Cu2     Sr1      116.34(3)   71_555    .      2_555  yes
Cu2     Cu2     Sr1      116.34(3)   71_555    .      3_555  yes
Cu2     Cu2     Sr2      180.00(3)   71_555    .       .     yes
Sr1     Cu2     Sr1      127.32(3)    2_555    .      3_555  yes
Sr1     Cu2     Sr2       63.66(2)    2_555    .       .     yes
Sr1     Cu2     Sr2       63.66(2)    3_555    .       .     yes
As1     Cu3     As1      110.67(4)   71_555    .     107_555 yes
As1     Cu3     As1      110.67(4)   71_555    .     171_556 yes
As1     Cu3     As4      108.24(4)   71_555    .       .     yes
As1     Cu3     Cu1      102.76(4)   71_555    .     72_555  yes
As1     Cu3     Cu1       59.14(3)   71_555    .     108_555 yes
As1     Cu3     Cu1       59.14(3)   71_555    .     172_555 yes
As1     Cu3     Cu3      124.64(4)   71_555    .      4_556  yes
As1     Cu3     Cu3       53.51(3)   71_555    .      7_655  yes
As1     Cu3     Cu3      124.64(4)   71_555    .     19_565  yes
As1     Cu3     Sr1      162.92(4)   71_555    .     49_555  yes
As1     Cu3     Sr1       62.07(3)   71_555    .     98_555  yes
As1     Cu3     Sr1       62.07(3)   71_555    .     147_555 yes
As1     Cu3     As1      110.67(4)   107_555   .     171_556 yes
As1     Cu3     As4      108.24(4)   107_555   .       .     yes
As1     Cu3     Cu1       59.14(3)   107_555   .     72_555  yes
As1     Cu3     Cu1      102.76(4)   107_555   .     108_555 yes
As1     Cu3     Cu1       59.14(3)   107_555   .     172_555 yes
As1     Cu3     Cu3      124.64(4)   107_555   .      4_556  yes
As1     Cu3     Cu3      124.64(4)   107_555   .      7_655  yes
As1     Cu3     Cu3       53.51(3)   107_555   .     19_565  yes
As1     Cu3     Sr1       62.07(3)   107_555   .     49_555  yes
As1     Cu3     Sr1      162.92(4)   107_555   .     98_555  yes
As1     Cu3     Sr1       62.07(3)   107_555   .     147_555 yes
As1     Cu3     As4      108.24(4)   171_556   .       .     yes
As1     Cu3     Cu1       59.14(3)   171_556   .     72_555  yes
As1     Cu3     Cu1       59.14(3)   171_556   .     108_555 yes
As1     Cu3     Cu1      102.76(4)   171_556   .     172_555 yes
As1     Cu3     Cu3       53.51(3)   171_556   .      4_556  yes
As1     Cu3     Cu3      124.64(4)   171_556   .      7_655  yes
As1     Cu3     Cu3      124.64(4)   171_556   .     19_565  yes
As1     Cu3     Sr1       62.07(3)   171_556   .     49_555  yes
As1     Cu3     Sr1       62.07(3)   171_556   .     98_555  yes
As1     Cu3     Sr1      162.92(4)   171_556   .     147_555 yes
As4     Cu3     Cu1      148.99(4)     .       .     72_555  yes
As4     Cu3     Cu1      148.99(4)     .       .     108_555 yes
As4     Cu3     Cu1      148.99(4)     .       .     172_555 yes
As4     Cu3     Cu3       54.74(3)     .       .      4_556  yes
As4     Cu3     Cu3       54.74(3)     .       .      7_655  yes
As4     Cu3     Cu3       54.74(3)     .       .     19_565  yes
As4     Cu3     Sr1       88.84(3)     .       .     49_555  yes
As4     Cu3     Sr1       88.84(3)     .       .     98_555  yes
As4     Cu3     Sr1       88.84(3)     .       .     147_555 yes
Cu1     Cu3     Cu1       52.99(3)   72_555    .     108_555 yes
Cu1     Cu3     Cu1       52.99(3)   72_555    .     172_555 yes
Cu1     Cu3     Cu3      106.53(4)   72_555    .      4_556  yes
Cu1     Cu3     Cu3      156.27(4)   72_555    .      7_655  yes
Cu1     Cu3     Cu3      106.53(4)   72_555    .     19_565  yes
Cu1     Cu3     Sr1       60.15(3)   72_555    .     49_555  yes
Cu1     Cu3     Sr1      105.95(3)   72_555    .     98_555  yes
Cu1     Cu3     Sr1      105.95(3)   72_555    .     147_555 yes
Cu1     Cu3     Cu1       52.99(3)   108_555   .     172_555 yes
Cu1     Cu3     Cu3      106.53(4)   108_555   .      4_556  yes
Cu1     Cu3     Cu3      106.53(4)   108_555   .      7_655  yes
Cu1     Cu3     Cu3      156.27(4)   108_555   .     19_565  yes
Cu1     Cu3     Sr1      105.95(3)   108_555   .     49_555  yes
Cu1     Cu3     Sr1       60.15(3)   108_555   .     98_555  yes
Cu1     Cu3     Sr1      105.95(3)   108_555   .     147_555 yes
Cu1     Cu3     Cu3      156.27(4)   172_555   .      4_556  yes
Cu1     Cu3     Cu3      106.53(4)   172_555   .      7_655  yes
Cu1     Cu3     Cu3      106.53(4)   172_555   .     19_565  yes
Cu1     Cu3     Sr1      105.95(3)   172_555   .     49_555  yes
Cu1     Cu3     Sr1      105.95(3)   172_555   .     98_555  yes
Cu1     Cu3     Sr1       60.15(3)   172_555   .     147_555 yes
Cu3     Cu3     Cu3       90.00(4)    4_556    .      7_655  yes
Cu3     Cu3     Cu3       90.00(4)    4_556    .     19_565  yes
Cu3     Cu3     Sr1       65.18(3)    4_556    .     49_555  yes
Cu3     Cu3     Sr1       65.18(3)    4_556    .     98_555  yes
Cu3     Cu3     Sr1      143.58(4)    4_556    .     147_555 yes
Cu3     Cu3     Cu3       90.00(4)    7_655    .     19_565  yes
Cu3     Cu3     Sr1      143.58(4)    7_655    .     49_555  yes
Cu3     Cu3     Sr1       65.18(3)    7_655    .     98_555  yes
Cu3     Cu3     Sr1       65.18(3)    7_655    .     147_555 yes
Cu3     Cu3     Sr1       65.18(3)   19_565    .     49_555  yes
Cu3     Cu3     Sr1      143.58(4)   19_565    .     98_555  yes
Cu3     Cu3     Sr1       65.18(3)   19_565    .     147_555 yes
Sr1     Cu3     Sr1      119.96(3)   49_555    .     98_555  yes
Sr1     Cu3     Sr1      119.96(3)   49_555    .     147_555 yes
Sr1     Cu3     Sr1      119.96(3)   98_555    .     147_555 yes
Cu2     As1     Cu2       81.97(3)   100_555   .     164_555 yes
Cu2     As1     Cu3      127.36(4)   100_555   .     70_555  yes
Cu2     As1     Cu3      127.36(4)   100_555   .     73_655  yes
Cu2     As1     Cu1       63.54(3)   100_555   .     100_555 yes
Cu2     As1     Cu1       63.54(3)   100_555   .     106_555 yes
Cu2     As1     Cu1      100.77(3)   100_555   .     164_555 yes
Cu2     As1     Cu1      100.77(3)   100_555   .     174_555 yes
Cu2     As1     Sr1       67.85(3)   100_555   .     102_555 yes
Cu2     As1     Sr1      149.82(4)   100_555   .     163_555 yes
Cu2     As1     As1       40.99(2)   100_555   .     71_555  yes
Cu2     As1     Cu3      127.36(4)   164_555   .     70_555  yes
Cu2     As1     Cu3      127.36(4)   164_555   .     73_655  yes
Cu2     As1     Cu1      100.77(3)   164_555   .     100_555 yes
Cu2     As1     Cu1      100.77(3)   164_555   .     106_555 yes
Cu2     As1     Cu1       63.54(3)   164_555   .     164_555 yes
Cu2     As1     Cu1       63.54(3)   164_555   .     174_555 yes
Cu2     As1     Sr1      149.82(4)   164_555   .     102_555 yes
Cu2     As1     Sr1       67.85(3)   164_555   .     163_555 yes
Cu2     As1     As1       40.99(2)   164_555   .     71_555  yes
Cu3     As1     Cu1      130.45(4)   70_555    .     100_555 yes
Cu3     As1     Cu1       68.09(3)   70_555    .     106_555 yes
Cu3     As1     Cu1      130.45(4)   70_555    .     164_555 yes
Cu3     As1     Cu1       68.09(3)   70_555    .     174_555 yes
Cu3     As1     Sr1       74.96(3)   70_555    .     102_555 yes
Cu3     As1     Sr1       74.96(3)   70_555    .     163_555 yes
Cu3     As1     As1      143.51(3)   70_555    .     71_555  yes
Cu3     As1     Cu1       68.09(3)   73_655    .     100_555 yes
Cu3     As1     Cu1      130.45(4)   73_655    .     106_555 yes
Cu3     As1     Cu1       68.09(3)   73_655    .     164_555 yes
Cu3     As1     Cu1      130.45(4)   73_655    .     174_555 yes
Cu3     As1     Sr1       74.96(3)   73_655    .     102_555 yes
Cu3     As1     Sr1       74.96(3)   73_655    .     163_555 yes
Cu3     As1     As1      143.51(3)   73_655    .     71_555  yes
Cu1     As1     Cu1      118.45(3)   100_555   .     106_555 yes
Cu1     As1     Cu1       57.65(3)   100_555   .     164_555 yes
Cu1     As1     Cu1      160.26(4)   100_555   .     174_555 yes
Cu1     As1     Sr1       66.36(3)   100_555   .     102_555 yes
Cu1     As1     Sr1      120.77(3)   100_555   .     163_555 yes
Cu1     As1     As1       80.13(3)   100_555   .     71_555  yes
Cu1     As1     Cu1      160.26(4)   106_555   .     164_555 yes
Cu1     As1     Cu1       57.65(3)   106_555   .     174_555 yes
Cu1     As1     Sr1       66.36(3)   106_555   .     102_555 yes
Cu1     As1     Sr1      120.77(3)   106_555   .     163_555 yes
Cu1     As1     As1       80.13(3)   106_555   .     71_555  yes
Cu1     As1     Cu1      118.45(3)   164_555   .     174_555 yes
Cu1     As1     Sr1      120.77(3)   164_555   .     102_555 yes
Cu1     As1     Sr1       66.36(3)   164_555   .     163_555 yes
Cu1     As1     As1       80.13(3)   164_555   .     71_555  yes
Cu1     As1     Sr1      120.77(3)   174_555   .     102_555 yes
Cu1     As1     Sr1       66.36(3)   174_555   .     163_555 yes
Cu1     As1     As1       80.13(3)   174_555   .     71_555  yes
Sr1     As1     Sr1      142.32(3)   102_555   .     163_555 yes
Sr1     As1     As1      108.84(3)   102_555   .     71_555  yes
Sr1     As1     As1      108.84(3)   163_555   .     71_555  yes
Cu1     As2     Cu1       68.21(3)     .       .      2_555  yes
Cu1     As2     Cu1       68.21(3)     .       .      3_555  yes
Cu1     As2     Cu2       65.51(3)     .       .       .     yes
Cu1     As2     Cu2       65.51(3)     .       .      2_555  yes
Cu1     As2     Cu2      123.33(4)     .       .      3_555  yes
Cu1     As2     Sr2      139.65(3)     .       .       .     yes
Cu1     As2     Sr1      120.25(3)     .       .       .     yes
Cu1     As2     Sr1      120.25(3)     .       .      2_555  yes
Cu1     As2     Sr1       64.11(3)     .       .      3_555  yes
Cu1     As2     As2      165.62(3)     .       .      4_555  yes
Cu1     As2     As2      100.12(3)     .       .      7_555  yes
Cu1     As2     As2      100.12(3)     .       .     19_555  yes
Cu1     As2     Cu1       68.21(3)    2_555    .      3_555  yes
Cu1     As2     Cu2      123.33(4)    2_555    .       .     yes
Cu1     As2     Cu2       65.51(3)    2_555    .      2_555  yes
Cu1     As2     Cu2       65.51(3)    2_555    .      3_555  yes
Cu1     As2     Sr2      139.65(3)    2_555    .       .     yes
Cu1     As2     Sr1       64.11(3)    2_555    .       .     yes
Cu1     As2     Sr1      120.25(3)    2_555    .      2_555  yes
Cu1     As2     Sr1      120.25(3)    2_555    .      3_555  yes
Cu1     As2     As2      100.12(3)    2_555    .      4_555  yes
Cu1     As2     As2      165.62(3)    2_555    .      7_555  yes
Cu1     As2     As2      100.12(3)    2_555    .     19_555  yes
Cu1     As2     Cu2       65.51(3)    3_555    .       .     yes
Cu1     As2     Cu2      123.33(4)    3_555    .      2_555  yes
Cu1     As2     Cu2       65.51(3)    3_555    .      3_555  yes
Cu1     As2     Sr2      139.65(3)    3_555    .       .     yes
Cu1     As2     Sr1      120.25(3)    3_555    .       .     yes
Cu1     As2     Sr1       64.11(3)    3_555    .      2_555  yes
Cu1     As2     Sr1      120.25(3)    3_555    .      3_555  yes
Cu1     As2     As2      100.12(3)    3_555    .      4_555  yes
Cu1     As2     As2      100.12(3)    3_555    .      7_555  yes
Cu1     As2     As2      165.62(3)    3_555    .     19_555  yes
Cu2     As2     Cu2      118.53(4)     .       .      2_555  yes
Cu2     As2     Cu2      118.53(4)     .       .      3_555  yes
Cu2     As2     Sr2       97.03(3)     .       .       .     yes
Cu2     As2     Sr1      172.56(4)     .       .       .     yes
Cu2     As2     Sr1       63.26(3)     .       .      2_555  yes
Cu2     As2     Sr1       63.26(3)     .       .      3_555  yes
Cu2     As2     As2      118.41(3)     .       .      4_555  yes
Cu2     As2     As2       42.29(3)     .       .      7_555  yes
Cu2     As2     As2      118.41(3)     .       .     19_555  yes
Cu2     As2     Cu2      118.53(4)    2_555    .      3_555  yes
Cu2     As2     Sr2       97.03(3)    2_555    .       .     yes
Cu2     As2     Sr1       63.26(3)    2_555    .       .     yes
Cu2     As2     Sr1      172.56(4)    2_555    .      2_555  yes
Cu2     As2     Sr1       63.26(3)    2_555    .      3_555  yes
Cu2     As2     As2      118.41(3)    2_555    .      4_555  yes
Cu2     As2     As2      118.41(3)    2_555    .      7_555  yes
Cu2     As2     As2       42.29(3)    2_555    .     19_555  yes
Cu2     As2     Sr2       97.03(3)    3_555    .       .     yes
Cu2     As2     Sr1       63.26(3)    3_555    .       .     yes
Cu2     As2     Sr1       63.26(3)    3_555    .      2_555  yes
Cu2     As2     Sr1      172.56(4)    3_555    .      3_555  yes
Cu2     As2     As2       42.29(3)    3_555    .      4_555  yes
Cu2     As2     As2      118.41(3)    3_555    .      7_555  yes
Cu2     As2     As2      118.41(3)    3_555    .     19_555  yes
Sr2     As2     Sr1       75.54(2)     .       .       .     yes
Sr2     As2     Sr1       75.54(2)     .       .      2_555  yes
Sr2     As2     Sr1       75.54(2)     .       .      3_555  yes
Sr2     As2     As2       54.74(2)     .       .      4_555  yes
Sr2     As2     As2       54.74(2)     .       .      7_555  yes
Sr2     As2     As2       54.74(2)     .       .     19_555  yes
Sr1     As2     Sr1      113.98(3)     .       .      2_555  yes
Sr1     As2     Sr1      113.98(3)     .       .      3_555  yes
Sr1     As2     As2       57.35(2)     .       .      4_555  yes
Sr1     As2     As2      130.27(3)     .       .      7_555  yes
Sr1     As2     As2       57.35(2)     .       .     19_555  yes
Sr1     As2     Sr1      113.98(3)    2_555    .      3_555  yes
Sr1     As2     As2       57.35(2)    2_555    .      4_555  yes
Sr1     As2     As2       57.35(2)    2_555    .      7_555  yes
Sr1     As2     As2      130.27(3)    2_555    .     19_555  yes
Sr1     As2     As2      130.27(3)    3_555    .      4_555  yes
Sr1     As2     As2       57.35(2)    3_555    .      7_555  yes
Sr1     As2     As2       57.35(2)    3_555    .     19_555  yes
As2     As2     As2       90.00       4_555    .      7_555  yes
As2     As2     As2       90.00       4_555    .     19_555  yes
As2     As2     As2       90.00       7_555    .     19_555  yes
Cu1     As3     Cu1       62.61(3)     .       .      2_555  yes
Cu1     As3     Cu1       62.61(3)     .       .      3_555  yes
Cu1     As3     Cu1       90.04(3)     .       .     70_555  yes
Cu1     As3     Cu1       57.38(3)     .       .     71_555  yes
Cu1     As3     Cu1      119.97(3)     .       .     72_555  yes
Cu1     As3     Cu1       90.04(3)     .       .     106_555 yes
Cu1     As3     Cu1       57.38(3)     .       .     107_555 yes
Cu1     As3     Cu1      119.97(3)     .       .     108_555 yes
Cu1     As3     Cu1      176.80(3)     .       .     172_555 yes
Cu1     As3     Cu1      119.97(3)     .       .     173_555 yes
Cu1     As3     Cu1      119.97(3)     .       .     174_555 yes
Cu1     As3     Cu1       62.61(3)    2_555    .      3_555  yes
Cu1     As3     Cu1      119.97(3)    2_555    .     70_555  yes
Cu1     As3     Cu1      119.97(3)    2_555    .     71_555  yes
Cu1     As3     Cu1      176.80(3)    2_555    .     72_555  yes
Cu1     As3     Cu1       57.38(3)    2_555    .     106_555 yes
Cu1     As3     Cu1       90.04(3)    2_555    .     107_555 yes
Cu1     As3     Cu1      119.97(3)    2_555    .     108_555 yes
Cu1     As3     Cu1      119.97(3)    2_555    .     172_555 yes
Cu1     As3     Cu1       90.04(3)    2_555    .     173_555 yes
Cu1     As3     Cu1       57.38(3)    2_555    .     174_555 yes
Cu1     As3     Cu1       57.38(3)    3_555    .     70_555  yes
Cu1     As3     Cu1       90.04(3)    3_555    .     71_555  yes
Cu1     As3     Cu1      119.97(3)    3_555    .     72_555  yes
Cu1     As3     Cu1      119.97(3)    3_555    .     106_555 yes
Cu1     As3     Cu1      119.97(3)    3_555    .     107_555 yes
Cu1     As3     Cu1      176.80(3)    3_555    .     108_555 yes
Cu1     As3     Cu1      119.97(3)    3_555    .     172_555 yes
Cu1     As3     Cu1       57.38(3)    3_555    .     173_555 yes
Cu1     As3     Cu1       90.04(3)    3_555    .     174_555 yes
Cu1     As3     Cu1       62.61(3)   70_555    .     71_555  yes
Cu1     As3     Cu1       62.61(3)   70_555    .     72_555  yes
Cu1     As3     Cu1      176.80(3)   70_555    .     106_555 yes
Cu1     As3     Cu1      119.97(3)   70_555    .     107_555 yes
Cu1     As3     Cu1      119.97(3)   70_555    .     108_555 yes
Cu1     As3     Cu1       90.04(3)   70_555    .     172_555 yes
Cu1     As3     Cu1       57.38(3)   70_555    .     173_555 yes
Cu1     As3     Cu1      119.97(3)   70_555    .     174_555 yes
Cu1     As3     Cu1       62.61(3)   71_555    .     72_555  yes
Cu1     As3     Cu1      119.97(3)   71_555    .     106_555 yes
Cu1     As3     Cu1       57.38(3)   71_555    .     107_555 yes
Cu1     As3     Cu1       90.04(3)   71_555    .     108_555 yes
Cu1     As3     Cu1      119.97(3)   71_555    .     172_555 yes
Cu1     As3     Cu1      119.97(3)   71_555    .     173_555 yes
Cu1     As3     Cu1      176.80(3)   71_555    .     174_555 yes
Cu1     As3     Cu1      119.97(3)   72_555    .     106_555 yes
Cu1     As3     Cu1       90.04(3)   72_555    .     107_555 yes
Cu1     As3     Cu1       57.38(3)   72_555    .     108_555 yes
Cu1     As3     Cu1       57.38(3)   72_555    .     172_555 yes
Cu1     As3     Cu1       90.04(3)   72_555    .     173_555 yes
Cu1     As3     Cu1      119.97(3)   72_555    .     174_555 yes
Cu1     As3     Cu1       62.61(3)   106_555   .     107_555 yes
Cu1     As3     Cu1       62.61(3)   106_555   .     108_555 yes
Cu1     As3     Cu1       90.04(3)   106_555   .     172_555 yes
Cu1     As3     Cu1      119.97(3)   106_555   .     173_555 yes
Cu1     As3     Cu1       57.38(3)   106_555   .     174_555 yes
Cu1     As3     Cu1       62.61(3)   107_555   .     108_555 yes
Cu1     As3     Cu1      119.97(3)   107_555   .     172_555 yes
Cu1     As3     Cu1      176.80(3)   107_555   .     173_555 yes
Cu1     As3     Cu1      119.97(3)   107_555   .     174_555 yes
Cu1     As3     Cu1       57.38(3)   108_555   .     172_555 yes
Cu1     As3     Cu1      119.97(3)   108_555   .     173_555 yes
Cu1     As3     Cu1       90.04(3)   108_555   .     174_555 yes
Cu1     As3     Cu1       62.61(3)   172_555   .     173_555 yes
Cu1     As3     Cu1       62.61(3)   172_555   .     174_555 yes
Cu1     As3     Cu1       62.61(3)   173_555   .     174_555 yes
Cu3     As4     Cu3       70.53(3)     .       .      4_556  yes
Cu3     As4     Cu3       70.53(3)     .       .      7_655  yes
Cu3     As4     Cu3      109.47(3)     .       .     10_656  yes
Cu3     As4     Cu3       70.53(3)     .       .     19_565  yes
Cu3     As4     Cu3      109.47(3)     .       .     22_566  yes
Cu3     As4     Cu3      180.00(3)     .       .     25_666  yes
Cu3     As4     Cu3      109.47(3)     .       .     28_665  yes
Cu3     As4     Sr1       54.74(3)     .       .     49_555  yes
Cu3     As4     Sr1      125.26(3)     .       .     55_655  yes
Cu3     As4     Sr1       54.74(3)     .       .     98_555  yes
Cu3     As4     Sr1      125.26(3)     .       .     115_565 yes
Cu3     As4     Sr1       54.74(3)     .       .     147_555 yes
Cu3     As4     Sr1      125.26(3)     .       .     150_556 yes
Cu3     As4     Cu3      109.47(3)    4_556    .      7_655  yes
Cu3     As4     Cu3       70.53(3)    4_556    .     10_656  yes
Cu3     As4     Cu3      109.47(3)    4_556    .     19_565  yes
Cu3     As4     Cu3       70.53(3)    4_556    .     22_566  yes
Cu3     As4     Cu3      109.47(3)    4_556    .     25_666  yes
Cu3     As4     Cu3      180.00(3)    4_556    .     28_665  yes
Cu3     As4     Sr1       54.74(3)    4_556    .     49_555  yes
Cu3     As4     Sr1      125.26(3)    4_556    .     55_655  yes
Cu3     As4     Sr1       54.74(3)    4_556    .     98_555  yes
Cu3     As4     Sr1      125.26(3)    4_556    .     115_565 yes
Cu3     As4     Sr1      125.26(3)    4_556    .     147_555 yes
Cu3     As4     Sr1       54.74(3)    4_556    .     150_556 yes
Cu3     As4     Cu3       70.53(3)    7_655    .     10_656  yes
Cu3     As4     Cu3      109.47(3)    7_655    .     19_565  yes
Cu3     As4     Cu3      180.00(3)    7_655    .     22_566  yes
Cu3     As4     Cu3      109.47(3)    7_655    .     25_666  yes
Cu3     As4     Cu3       70.53(3)    7_655    .     28_665  yes
Cu3     As4     Sr1      125.26(3)    7_655    .     49_555  yes
Cu3     As4     Sr1       54.74(3)    7_655    .     55_655  yes
Cu3     As4     Sr1       54.74(3)    7_655    .     98_555  yes
Cu3     As4     Sr1      125.26(3)    7_655    .     115_565 yes
Cu3     As4     Sr1       54.74(3)    7_655    .     147_555 yes
Cu3     As4     Sr1      125.26(3)    7_655    .     150_556 yes
Cu3     As4     Cu3      180.00(3)   10_656    .     19_565  yes
Cu3     As4     Cu3      109.47(3)   10_656    .     22_566  yes
Cu3     As4     Cu3       70.53(3)   10_656    .     25_666  yes
Cu3     As4     Cu3      109.47(3)   10_656    .     28_665  yes
Cu3     As4     Sr1      125.26(3)   10_656    .     49_555  yes
Cu3     As4     Sr1       54.74(3)   10_656    .     55_655  yes
Cu3     As4     Sr1       54.74(3)   10_656    .     98_555  yes
Cu3     As4     Sr1      125.26(3)   10_656    .     115_565 yes
Cu3     As4     Sr1      125.26(3)   10_656    .     147_555 yes
Cu3     As4     Sr1       54.74(3)   10_656    .     150_556 yes
Cu3     As4     Cu3       70.53(3)   19_565    .     22_566  yes
Cu3     As4     Cu3      109.47(3)   19_565    .     25_666  yes
Cu3     As4     Cu3       70.53(3)   19_565    .     28_665  yes
Cu3     As4     Sr1       54.74(3)   19_565    .     49_555  yes
Cu3     As4     Sr1      125.26(3)   19_565    .     55_655  yes
Cu3     As4     Sr1      125.26(3)   19_565    .     98_555  yes
Cu3     As4     Sr1       54.74(3)   19_565    .     115_565 yes
Cu3     As4     Sr1       54.74(3)   19_565    .     147_555 yes
Cu3     As4     Sr1      125.26(3)   19_565    .     150_556 yes
Cu3     As4     Cu3       70.53(3)   22_566    .     25_666  yes
Cu3     As4     Cu3      109.47(3)   22_566    .     28_665  yes
Cu3     As4     Sr1       54.74(3)   22_566    .     49_555  yes
Cu3     As4     Sr1      125.26(3)   22_566    .     55_655  yes
Cu3     As4     Sr1      125.26(3)   22_566    .     98_555  yes
Cu3     As4     Sr1       54.74(3)   22_566    .     115_565 yes
Cu3     As4     Sr1      125.26(3)   22_566    .     147_555 yes
Cu3     As4     Sr1       54.74(3)   22_566    .     150_556 yes
Cu3     As4     Cu3       70.53(3)   25_666    .     28_665  yes
Cu3     As4     Sr1      125.26(3)   25_666    .     49_555  yes
Cu3     As4     Sr1       54.74(3)   25_666    .     55_655  yes
Cu3     As4     Sr1      125.26(3)   25_666    .     98_555  yes
Cu3     As4     Sr1       54.74(3)   25_666    .     115_565 yes
Cu3     As4     Sr1      125.26(3)   25_666    .     147_555 yes
Cu3     As4     Sr1       54.74(3)   25_666    .     150_556 yes
Cu3     As4     Sr1      125.26(3)   28_665    .     49_555  yes
Cu3     As4     Sr1       54.74(3)   28_665    .     55_655  yes
Cu3     As4     Sr1      125.26(3)   28_665    .     98_555  yes
Cu3     As4     Sr1       54.74(3)   28_665    .     115_565 yes
Cu3     As4     Sr1       54.74(3)   28_665    .     147_555 yes
Cu3     As4     Sr1      125.26(3)   28_665    .     150_556 yes
Sr1     As4     Sr1      180.00(2)   49_555    .     55_655  yes
Sr1     As4     Sr1       90.00      49_555    .     98_555  yes
Sr1     As4     Sr1       90.00      49_555    .     115_565 yes
Sr1     As4     Sr1       90.00      49_555    .     147_555 yes
Sr1     As4     Sr1       90.00      49_555    .     150_556 yes
Sr1     As4     Sr1       90.00      55_655    .     98_555  yes
Sr1     As4     Sr1       90.00      55_655    .     115_565 yes
Sr1     As4     Sr1       90.00      55_655    .     147_555 yes
Sr1     As4     Sr1       90.00      55_655    .     150_556 yes
Sr1     As4     Sr1      180.00(2)   98_555    .     115_565 yes
Sr1     As4     Sr1       90.00      98_555    .     147_555 yes
Sr1     As4     Sr1       90.00      98_555    .     150_556 yes
Sr1     As4     Sr1       90.00      115_565   .     147_555 yes
Sr1     As4     Sr1       90.00      115_565   .     150_556 yes
Sr1     As4     Sr1      180.00(2)   147_555   .     150_556 yes
